# Supplementary material for: Palladium-catalyzed highly atom-economical allylation of oxindoles with vinyl cyclopropanes
Source: Royal Society of Chemistry journal article supplement (doi:10.1039/c5ob02653a), 2016-01-01
Supplement: c5ob02653a1.pdf [file c5ob02653a1.pdf]

Electronic Supplementary Material (ESI) for Organic & Biomolecular Chemistry.  
This journal is © The Royal Society of Chemistry 2015

## Supporting Information

### **Palladium catalyzed direct allylation of azlactones with simple allylic alcohols in the absence of any activators<sup>†</sup>**

Ruwei Cao,<sup>a,c</sup> Jinlong Zhang,<sup>a</sup> Hui Zhou,<sup>a,c</sup> Huameng Yang,<sup>a</sup> and Gaoxi Jiang<sup>a,b</sup>

<sup>a</sup>State Key Laboratory for Oxo Synthesis and Selective Oxidation, Lanzhou Institute of Chemical and Physics,  
Chinese Academy of Sciences, Lanzhou, 730000, China, Fax: +86-512-62872775;

E-mail: cgxia@lzb.ac.cn, gxjiang2012@sinano.ac.cn

<sup>b</sup>Graduate University of Chinese Academy of Sciences, Beijing, China.

<sup>c</sup>University of Chinese Academy of Sciences, Beijing 100049, P. R. China

## Contents

|                                                                                |           |
|--------------------------------------------------------------------------------|-----------|
| <b>1 General experimental materials .....</b>                                  | <b>2</b>  |
| <b>2 Optimization of the reaction conditions.....</b>                          | <b>2</b>  |
| <b>3 General procedures for the synthesis of 1b-t .....</b>                    | <b>3</b>  |
| <b>4 General procedures for the synthesis of VCPs .....</b>                    | <b>3</b>  |
| <b>5 Experimental characterization data for products .....</b>                 | <b>3</b>  |
| <b>6 Asymmetric allylation reaction .....</b>                                  | <b>10</b> |
| <b>7 <sup>1</sup>H and <sup>13</sup>C NMR spectras for all compounds .....</b> | <b>11</b> |
| <b>8 HPLC spectre .....</b>                                                    | <b>34</b> |

## 1. General experiment details and materials

Experimental: NMR spectra were recorded on BRUKER Avenue III 400MHz spectrometers and Varian Mercury-300 MHz spectrometers. Chemical shifts were reported in parts per million (ppm) down field from TMS with the solvent resonance as the internal standard. Coupling constants(J) were reported in Hz. High resolution mass spectra (HRMS) were recorded on Bruker MicrOTOF-Q II mass instrument (ESI). The oxindoles with different substituent used here are known compounds, which were purchased from Alfa Aesar and Suzhou (China) Amatek Co. Ltd. The oxindole and vinyl cyclopropanes are both known compounds and synthesized according to the reported methods. Pd(PPh<sub>3</sub>)<sub>4</sub> here were purchased and used as such. Moreover, commercially available reagents were used without additional purification. All non-aqueous manipulations and reactions were using standard Schlenk techniques. All solvents before use were dried and degassed by standard methods and stored under argon atmosphere. All reactions were monitored by TLC with silica gel-coated plates.

## 2. Optimization of the reaction conditions

Oxindole **1a** (31 mg, 0.1 mmol), transition metal catalysts, VCP **2a** (16  $\mu$ L, 0.12 mmol), solvent (1.0 mL) were added to a 10 mL flame-dried schlenk tube, the reactions were monitored by TLC. When the reaction is over, the reaction mixture was diluted with CH<sub>2</sub>Cl<sub>2</sub> (2.0 mL), filtered through diatomaceous earth to remove the metal salts and washed with CH<sub>2</sub>Cl<sub>2</sub> (3.0 ml) for three times. All volatiles were removed by evaporation to give crude residue.

**Table 1** Optimization of the reaction conditions for the allylation of oxindole **1a** with vinyl cyclopropane **2a**<sup>a</sup>.

| Entry | Cat. [mol%]                             | L [mol%]              | Solvent           | Yield (%) <sup>b</sup> | L/B <sup>d</sup> |
|-------|-----------------------------------------|-----------------------|-------------------|------------------------|------------------|
| 1     | Fe(acac) <sub>3</sub> [5]               | PPh <sub>3</sub> [10] | Toluene           | -                      | -                |
| 2     | Cu(OAc) <sub>2</sub> [5]                | -                     | Toluene           | -                      | -                |
| 3     | Ni(AcAc) <sub>2</sub> [5]               | -                     | Toluene           | -                      | -                |
| 4     | Sc(OTf) <sub>3</sub> [5]                | PPh <sub>3</sub> [10] | Toluene           | -                      | -                |
| 5     | Mn(OAc) <sub>2</sub> [5]                | PPh <sub>3</sub> [10] | Toluene           | -                      | -                |
| 6     | Pd(PPh <sub>3</sub> ) <sub>4</sub> [10] | -                     | Toluene           | 99                     | > 20:1           |
| 7     | Pd(PPh <sub>3</sub> ) <sub>4</sub> [10] | -                     | THF               | 99                     | > 20:1           |
| 8     | Pd(PPh <sub>3</sub> ) <sub>4</sub> [10] | -                     | Dioxane           | 91                     | > 20:1           |
| 9     | Pd(PPh <sub>3</sub> ) <sub>4</sub> [10] | -                     | Hexane            | -                      | -                |
| 10    | Pd(PPh <sub>3</sub> ) <sub>4</sub> [10] | -                     | PhNO <sub>2</sub> | -                      | -                |
| 11    | Pd(PPh <sub>3</sub> ) <sub>4</sub> [10] | -                     | PhCl              | -                      | -                |
| 12    | Pd(PPh <sub>3</sub> ) <sub>4</sub> [5]  | -                     | THF               | 99                     | > 20:1           |
| 13    | Pd(PPh <sub>3</sub> ) <sub>4</sub> [2]  | -                     | THF               | 97 <sup>c</sup>        | > 20:1           |
| 14    | Pd(PPh <sub>3</sub> ) <sub>4</sub> [1]  | -                     | THF               | 80                     | > 20:1           |

<sup>a</sup> Reaction conditions: oxindole **1a** (0.1 mmol), vinyl cyclopropane **2a** (0.12 mmol, 1.2 equiv.), catalyst and ligand in 1 mL of solvent at 25 °C for 3 h under nitrogen atmosphere. <sup>b</sup> Yield were determined by <sup>1</sup>H NMR analysis. <sup>c</sup> Isolated yield. <sup>d</sup> Determined by <sup>1</sup>H NMR analysis

### 3 General procedures for the synthesis of 1a-q.

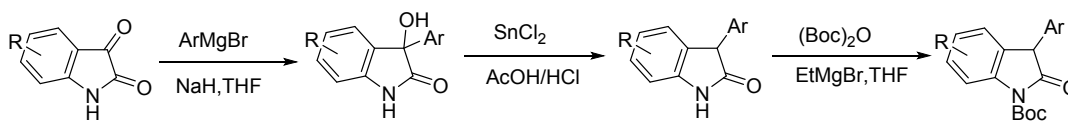

The *N*-Boc substituted oxindoles used in this study were prepared according to the literature<sup>[1]</sup>.

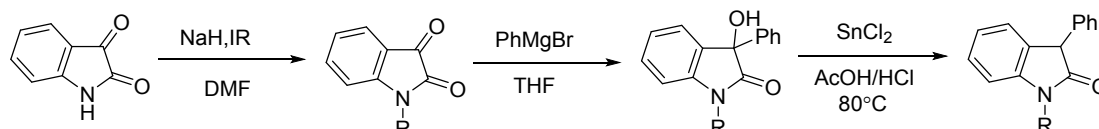

The *N*-alkyl substituted oxindoles used in this study were prepared by the following 3-step sequence according to the literature<sup>[2]</sup>.

### 4 General procedure for the preparation of VCPs<sup>[3]</sup>

The corresponding C-H acidic compound (1 equiv) and 1,4-dibromobut-2-ene (1 equiv) are added to a round bottom flask with a stir bar under an atmosphere of nitrogen. To this is added tetrahydrofuran (0.2 M) and cesium carbonate (2.5 equiv). A condenser is added, and reaction mixture is then heated to 60 °C overnight. After cooling down to room temperature, the reaction mixture is filtered over celite and washed with diethyl ether. The organic phase is washed with saturated aqueous NaHCO<sub>3</sub>, followed by water and brine. After filtration over Na<sub>2</sub>SO<sub>4</sub>, the solvent is removed under reduced pressure. The crude product is purified by means of silica gel chromatography using petroleum ether and diethyl ether as the eluent. The yields are not optimized for the synthesis of vinyl cyclopropanes.

1 Xing-Li Zhu.; Jin-Hui Xu.; Xin-Yuan Liu.; and Bin Tan .*Org. Lett.* **2014**, *16*, 2192–2195.

2 Barry M. Trost, Jia Xie, *J. Am. Chem. Soc.* **2011**, *133*, 20611–20622.

3 Dieskau, Andre P.; Holzwarth, Michael S.; Plietker, Bernd *J. Am. Chem. Soc.* **2012**, *134*, 5048–5051.

### 5. Experimental characterization data for products

#### diethyl-2-(4-(1-(tert-butoxycarbonyl)-2-oxo-3-phenylindolin-3-yl)but-2-en-1-yl)malonate (3a):

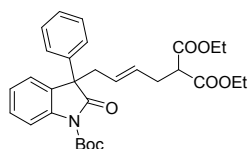

The title compound was prepared according to the general procedure as an oil liquid in 97% yield. <sup>1</sup>H NMR (400 MHz, CDCl<sub>3</sub>) δ 7.92 (d, *J* = 8.2 Hz, 1H), 7.39 – 7.17 (m, 8H), 5.41 (dd, *J* = 14.7, 7.5 Hz, 1H), 5.20 (dd, *J* = 14.9, 7.1 Hz, 1H), 4.23 – 3.98 (m, 4H), 3.17 (t, *J* = 7.5 Hz, 1H), 2.99 (t, *J* = 6.2 Hz, 2H), 2.52 – 2.36 (m, 2H), 1.62 (s, 9H), 1.21 (td, *J* = 7.1, 2.5 Hz, 6H); <sup>13</sup>C NMR (101 MHz, CDCl<sub>3</sub>) δ 176.17, 168.64, 168.63, 149.19, 139.78, 139.08, 128.55, 127.21, 124.29, 115.11, 84.25, 61.28, 56.66, 51.75, 51.57, 41.30, 31.53, 28.03, 14.02, 13.93; MS (EI) [M]<sup>+</sup> Calcd. for C<sub>30</sub>H<sub>35</sub>NO<sub>7</sub>: 521.2414, found for C<sub>30</sub>H<sub>35</sub>NO<sub>7</sub>: 521.2424.

**diethyl-2-(4-(1-(tert-butoxycarbonyl)-5-methyl-2-oxo-3-phenylindolin-3-yl)but-2-en-1-yl)malonate (3b):**

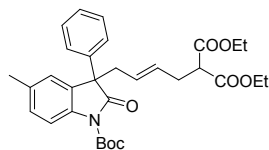

The title compound was prepared according to the general procedure as an oil liquid in 90% yield.  $^1\text{H}$  NMR (400 MHz,  $\text{CDCl}_3$ )  $\delta$  7.78 (d,  $J$  = 8.3 Hz, 1H), 7.22 – 7.31 (m,  $J$  = 8.4, 7.2 Hz, 5H), 7.15 (d,  $J$  = 8.3, 1.1 Hz, 1H), 6.99 (s, 1H), 5.44 (m,  $J$  = 14.1, 7.0 Hz, 1H), 5.24 – 5.12 (m, 1H), 4.15 – 4.06 (m, 4H), 3.18 (t,  $J$  = 7.5 Hz, 1H), 3.08 – 2.91 (m, 2H), 2.50 – 2.34 (m, 5H), 1.61 (s, 9H), 1.21 (td,  $J$  = 7.1, 1.9 Hz, 8H);  $^{13}\text{C}$  NMR (101 MHz,  $\text{CDCl}_3$ )  $\delta$  177.98, 168.73, 168.71, 142.91, 139.63, 135.93, 128.66, 127.34, 127.01, 122.48, 109.30, 61.31, 60.34, 56.46, 51.69, 40.67, 31.91, 29.34, 21.01, 14.19, 14.12, 14.06, 10.27; MS (EI)  $[\text{M}]^+$  Calcd for  $\text{C}_{31}\text{H}_{37}\text{O}_7\text{N}$ : 535.2570, found for  $\text{C}_{31}\text{H}_{37}\text{O}_7\text{N}$  535.2590.

**diethyl-2-(4-(1-(tert-butoxycarbonyl)-5-methoxy-2-oxo-3-phenylindolin-3-yl)but-2-en-1-yl)malonate (3c):**

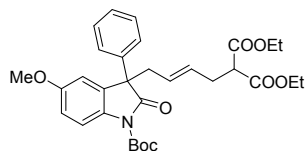

The title compound was prepared according to the general procedure as an oil liquid in 91% yield.  $^1\text{H}$  NMR (400 MHz,  $\text{CDCl}_3$ )  $\delta$  7.86 – 7.79 (m, 1H), 7.33 – 7.05 (m, 5H), 6.91 – 6.76 (m, 1H), 6.73 (d,  $J$  = 2.5 Hz, 1H), 5.51 – 5.32 (m, 1H), 5.50 – 5.37 (m, 1H), 4.16 – 4.05 (m, 4H), 3.81 (s, 3H), 3.17 (t,  $J$  = 7.5 Hz, 1H), 2.97 (m, 2H), 2.43 (t,  $J$  = 7.1 Hz, 2H), 1.60 (s, 9H), 1.23 – 1.07 (m, 6H);  $^{13}\text{C}$  NMR (101 MHz,  $\text{CDCl}_3$ )  $\delta$  176.23, 168.69, 168.67, 156.71, 149.25, 139.06, 133.18, 131.64, 131.15, 128.57, 127.57, 127.22, 126.37, 116.04, 113.26, 111.20, 84.09, 61.29, 57.02, 55.62, 51.74, 41.12, 31.54, 28.05, 14.17, 14.01; MS (EI)  $[\text{M}]^+$  Calcd for  $\text{C}_{31}\text{H}_{37}\text{NO}_8$ : 551.2519, found for  $\text{C}_{31}\text{H}_{37}\text{NO}_8$ : 551.2513.

**diethyl-2-(4-(1-(tert-butoxycarbonyl)-5-fluoro-2-oxo-3-phenylindolin-3-yl)but-2-en-1-yl)malonate (3d):**

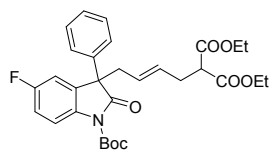

The title compound was prepared according to the general procedure as 95% yield.  $^1\text{H}$  NMR (400 MHz,  $\text{CDCl}_3$ )  $\delta$  7.90 (q,  $J$  = 9.0, 4.6 Hz, 1H), 7.33 – 7.23 (m, 5H), 7.04 (td,  $J$  = 2.7 Hz, 1H), 6.90 (dd,  $J$  = 7.9, 2.7 Hz, 1H), 5.41 (m, 1H), 5.21 – 5.13 (m, 1H), 4.15 – 4.05 (m, 4H), 3.16 (t,  $J$  = 7.5 Hz, 1H), 2.96 (m,  $J$  = 12.1, 7.3 Hz, 2H), 2.42 (m,  $J$  = 5.6 Hz, 2H), 1.59 (s, 9H), 1.19 (td,  $J$  = 7.1, 2.7 Hz, 6H);  $^{13}\text{C}$  NMR (101 MHz,  $\text{CDCl}_3$ )  $\delta$  175.80, 168.64, 160.96, 158.53, 149.14, 138.43, 132.20, 128.72, 127.82, 127.08, 126.01, 121.03, 116.53, 115.15, 114.92, 112.66, 112.42, 84.54, 61.37, 61.35, 56.88, 51.69, 43.41, 41.14, 31.51, 28.02, 14.01; MS (EI)  $[\text{M}]^+$  Calcd. for  $\text{C}_{30}\text{H}_{34}\text{FNO}_7$ : 539.2319, found for  $\text{C}_{30}\text{H}_{34}\text{FNO}_7$ : 539.2339.

**diethyl-2-(4-(1-(tert-butoxycarbonyl)-5-chloro-2-oxo-3-phenylindolin-3-yl)but-2-en-1-yl)malonate (3e):**

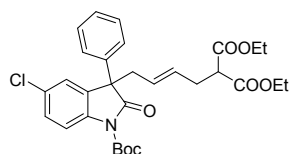

The title compound was prepared according to the general procedure as an oil liquid in 93% yield.  $^1\text{H}$  NMR (400 MHz,  $\text{cdcl}_3$ )  $\delta$  7.85 (d,  $J$  = 8.7 Hz, 1H), 7.50 (dd,  $J$  = 8.7, 2.1 Hz, 1H), 7.36 – 7.26 (m, 6H), 5.47 (m,  $J$  = 14.2, 7.0 Hz, 1H), 5.25 – 5.12 (m, 1H), 4.15 (m,  $J$  = 14.2, 7.1 Hz, 4H), 3.20 (t,  $J$  = 7.5 Hz, 1H), 3.07 – 2.92 (m, 2H), 2.47 (m,  $J$  = 7.3 Hz, 2H), 1.62 (s, 9H), 1.26 – 1.19 (td, 6H);  $^{13}\text{C}$  NMR (101 MHz,  $\text{cdcl}_3$ )  $\delta$  175.50, 168.66, 168.64, 149.02, 138.39, 138.34,

129.83, 127.86, 125.20, 116.44, 84.71, 61.39, 61.35, 56.81, 51.70, 43.41, 41.09, 31.52, 28.01, 14.03; MS (EI) [M]<sup>+</sup> Calcd for C<sub>30</sub>H<sub>34</sub>O<sub>7</sub>NCl: 555.2024, found for C<sub>30</sub>H<sub>34</sub>O<sub>7</sub>NCl: 555.2054.

**diethyl-2-(4-(5-bromo-1-(tert-butoxycarbonyl)-2-oxo-3-phenylindolin-3-yl)but-2-en-1-yl)malonate (3f):**

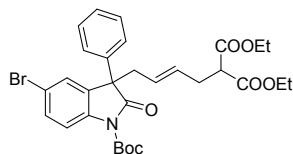

The title compound was prepared according to the general procedure as an oil liquid in 90% yield. <sup>1</sup>H NMR (400 MHz, CDCl<sub>3</sub>) δ 7.84 (d, *J* = 8.7 Hz, 1H), 7.49 (dd, *J* = 8.7, 2.1 Hz, 1H), 7.36 – 7.24 (m, 6H), 5.46 (m, *J* = 14.2, 7.0 Hz, 1H), 5.23 – 5.12 (m, 1H), 4.18 – 4.10 (m, 4H), 3.19 (t, *J* = 7.5 Hz, 1H), 3.06 – 2.90 (m, 2H), 2.45 (t, *J* = 7.5 Hz, 2H), 1.61 (s, 9H), 1.22 (td, *J* = 7.1, 1.6 Hz, 6H); <sup>13</sup>C NMR (100 MHz, CDCl<sub>3</sub>) δ 175.36, 168.65, 168.63, 148.99, 138.86, 138.40, 128.76, 125.86, 117.35, 116.84, 84.72, 61.38, 61.34, 56.77, 51.70, 41.07, 31.52, 28.01, 21.04, 14.18, 14.04; MS (EI) [M]<sup>+</sup> Calcd for C<sub>30</sub>H<sub>34</sub>BrNO<sub>7</sub>: 599.1519, found for C<sub>30</sub>H<sub>34</sub>BrNO<sub>7</sub>: 9.1525.

**diethyl-2-(4-(1-(tert-butoxycarbonyl)-7-fluoro-2-oxo-3-phenylindolin-3-yl)but-2-en-1-yl)malonate (3g):**

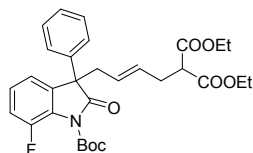

The title compound was prepared according to the general procedure as an oil liquid in 95% yield. <sup>1</sup>H NMR (400 MHz, CDCl<sub>3</sub>) δ 7.34 – 7.26 (m, 5H), 7.22 – 7.09 (m, 2H), 7.00 (dd, *J* = 7.3, 1.1 Hz, 1H), 5.41 – 5.48 (m, *J* = 14.7, 7.4 Hz, 1H), 5.24 – 5.15 (m, 1H), 4.20 – 4.09 (m, 4H), 3.21 (t, *J* = 7.6 Hz, 1H), 3.01 (m, *J* = 15.1, 6.9 Hz, 2H), 2.45 (m, *J* = 15.1, 7.5 Hz, 2H), 1.60 (s, 9H), 1.23 (td, *J* = 7.1, 2.5 Hz, 6H); <sup>13</sup>C NMR (101 MHz, CDCl<sub>3</sub>) δ 175.70, 168.71, 168.66, 149.98, 147.48, 147.46, 138.40, 127.79, 126.70, 125.24, 120.91, 116.71, 116.51, 84.91, 61.33, 57.52, 51.73, 41.24, 31.55, 27.66, 14.03; MS (EI) [M]<sup>+</sup> Calcd for C<sub>30</sub>H<sub>34</sub>FNO<sub>7</sub>: 539.2319, found for C<sub>30</sub>H<sub>34</sub>FNO<sub>7</sub>: 539.2349.

**diethyl-2-(4-(1-(tert-butoxycarbonyl)-2-oxo-3-(p-tolyl)indolin-3-yl)but-2-en-1-yl)malonate (3h):**

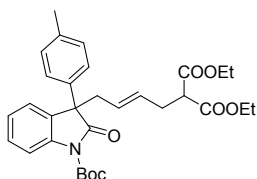

The title compound was prepared according to the general procedure as an oil liquid in 93% yield. <sup>1</sup>H NMR (400 MHz, CDCl<sub>3</sub>) δ 7.91 (d, *J* = 8.3 Hz, 1H), 7.37 – 7.19 (m, 2H), 7.19 – 7.08 (m, 5H), 7.08 (s, 1H), 5.48 – 5.29 (m, 1H), 5.46 – 5.35 (m, 1H), 4.34 – 3.90 (m, 4H), 3.16 (m, *J* = 7.4, 0.9 Hz, 1H), 2.95 (m, *J* = 6.4 Hz, 2H), 2.42 (d, *J* = 2.9 Hz, 2H), 2.28 (s, 4H), 1.60 (t, *J* = 3.0 Hz, 9H), 1.27 – 1.07 (td, *J* = 7.1, 2.5 Hz, 6H); <sup>13</sup>C NMR (101 MHz, cdcl<sub>3</sub>) δ 176.30, 168.65, 149.25, 139.77, 137.29, 136.14, 131.03, 126.55, 124.25, 115.08, 84.17, 61.28, 60.32, 56.36, 51.77, 41.24, 31.54, 28.02, 20.91, 14.17, 14.02; MS (EI) [M]<sup>+</sup> Calcd for C<sub>31</sub>H<sub>37</sub>NO<sub>7</sub>: 535.26, found.

**diethyl-2-(4-(1-(tert-butoxycarbonyl)-3-(4-fluorophenyl)-2-oxoindolin-3-yl)but-2-en-1-yl)malonate (3i):**

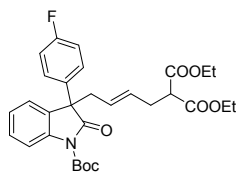

The title compound was prepared according to the general procedure as an oil liquid in 92% yield. <sup>1</sup>H NMR (400 MHz, CDCl<sub>3</sub>) δ 7.90 (d, *J* = 8.2 Hz, 1H), 7.34 (td, 1H), 7.30 – 7.23 (m, 2H), 7.23 – 7.14 (m, 2H), 6.95 (t, *J* = 8.7 Hz, 2H), 5.39 (m, *J* = 14.7, 7.4 Hz, 1H), 5.16 (m, *J* = 15.0, 7.3 Hz, 1H), 4.10 (m, *J* = 9.2, 7.5, 1.6 Hz, 4H), 3.15 (t, *J* = 7.5 Hz, 1H), 2.98 – 2.87 (m,

2H), 2.40 (td,  $J = 7.1, 3.1$  Hz, 2H), 1.59 (s, 9H), 1.18 (td,  $J = 7.1, 2.4$  Hz, 6H);  $^{13}\text{C}$  NMR (101 MHz,  $\text{CDCl}_3$ )  $\delta$  176.09, 168.62, 163.36, 160.91, 149.11, 139.72, 131.07, 128.82, 124.37, 115.46, 115.25, 115.22, 84.41, 61.30, 56.05, 51.71, 41.56, 31.50, 28.01, 14.00; MS (EI)  $[\text{M}]^+$  Calcd for  $\text{C}_{30}\text{H}_{34}\text{FNO}_7$ : 539.2319, found for  $\text{C}_{30}\text{H}_{34}\text{FNO}_7$ : 539.2359.

**diethyl-2-(4-(1-(tert-butoxycarbonyl)-3-(4-chlorophenyl)-2-oxoindolin-3-yl)but-2-en-1-yl)malonate (3j):**

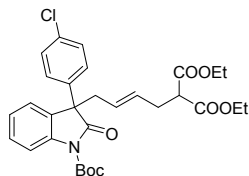

The title compound was prepared according to the general procedure as an oil liquid in 90% yield.  $^1\text{H}$  NMR (400 MHz,  $\text{CDCl}_3$ )  $\delta$  7.38 – 7.32 (m, 1H), 7.31 – 7.27 (m, 3H), 7.27 – 7.21 (m, 2H), 7.18 (m,  $J = 11.1, 5.7$  Hz, 2H), 5.46 – 5.36 (m, 1H), 5.24 – 5.13 (m, 1H), 4.18 – 4.04 (m, 4H), 3.16 (t,  $J = 7.5$  Hz, 1H), 3.02 – 2.90 (m, 2H), 2.47 – 2.36 (m, 2H), 1.58 (d,  $J = 16.6$  Hz, 9H), 1.24 – 1.17 (td, 6H);  $^{13}\text{C}$  NMR (101 MHz,  $\text{CDCl}_3$ )  $\delta$  176.09, 168.70, 149.21, 139.77, 139.04, 131.14, 130.26, 128.56, 128.41, 127.57, 127.24, 126.46, 125.26, 124.28, 115.12, 84.41, 61.30, 56.05, 51.71, 41.56, 31.50, 28.01, 14.00; MS (EI)  $[\text{M}]^+$  Calcd for  $\text{C}_{30}\text{H}_{34}\text{ClNO}_7$ : 555.2024, found for  $\text{C}_{30}\text{H}_{34}\text{ClNO}_7$ : 555.2054.

**diethyl-2-(4-(1-(tert-butoxycarbonyl)-3-(3-methoxyphenyl)-2-oxoindolin-3-yl)but-2-en-1-yl)malonate (3k):**

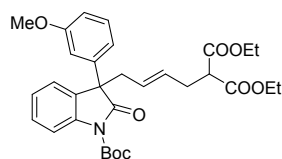

The title compound was prepared according to the general procedure as an oil liquid in 93% yield.  $^1\text{H}$  NMR (400 MHz,  $\text{CDCl}_3$ )  $\delta$  7.77 (d,  $J = 8.2$  Hz, 1H), 7.50 (dd,  $J = 7.8, 1.5$  Hz, 1H), 7.20 (m,  $J = 11.4, 4.4$  Hz, 2H), 6.99 (m,  $J = 7.5, 4.9, 0.9$  Hz, 2H), 6.82 – 6.70 (m, 2H), 5.35 (m,  $J = 14.1, 6.9$  Hz, 1H), 5.22 – 5.10 (m, 1H), 4.17 – 4.06 (m, 4H), 3.41 (s, 3H), 3.13 (t,  $J = 7.5$  Hz, 1H), 2.90 (t,  $J = 6.7$  Hz, 2H), 2.48 – 2.30 (m, 2H), 1.64 (s,  $J = 4.8$  Hz, 9H), 1.20 (td,  $J = 7.1, 1.1$  Hz, 6H);  $^{13}\text{C}$  NMR (101 MHz,  $\text{CDCl}_3$ )  $\delta$  177.46, 168.74, 168.67, 156.67, 149.56, 140.05, 131.27, 127.07, 123.97, 120.84, 114.17, 112.23, 83.57, 61.27, 60.32, 55.62, 54.02, 51.84, 40.06, 31.60, 28.12, 21.00, 14.17, 14.02; MS (EI)  $[\text{M}]^+$  Calcd for  $\text{C}_{31}\text{H}_{37}\text{NO}_8$ : 551.2519, found for  $\text{C}_{31}\text{H}_{37}\text{NO}_8$ : 551.2525.

**diethyl-2-(4-(1-(tert-butoxycarbonyl)-3-(3-fluorophenyl)-2-oxoindolin-3-yl)but-2-en-1-yl)malonate (3l):**

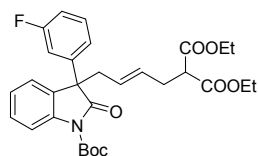

The title compound was prepared according to the general procedure as an oil liquid in 96% yield.  $^1\text{H}$  NMR (400 MHz,  $\text{CDCl}_3$ )  $\delta$  7.90 (d,  $J = 8.2$  Hz, 1H), 7.40 – 7.32 (m, 1H), 7.26 – 7.16 (m, 3H), 7.08 (ddd,  $J = 7.9, 1.6, 0.8$  Hz, 1H), 7.01 (m,  $J = 10.6$  Hz, 1H), 6.93 (m,  $J = 2.5, 0.8$  Hz, 1H), 5.39 (m, 1H), 5.18 (m, 1H), 4.16 – 4.06 (m, 4H), 3.16 (t,  $J = 7.5$  Hz, 1H), 2.94 (d,  $J = 7.2$  Hz, 2H), 2.41 (m,  $J = 2.7$  Hz, 2H), 1.60 (s, 9H), 1.22 – 1.16 (td, 6H);  $^{13}\text{C}$  NMR (101 MHz,  $\text{CDCl}_3$ )  $\delta$  175.68, 168.62, 163.98, 161.54, 149.05, 141.53, 139.71, 131.49, 126.02, 124.43, 122.95, 115.24, 114.71, 114.65, 114.48, 114.45, 84.48, 61.31, 56.40, 51.69, 41.39, 31.50, 28.01, 14.01; MS (EI)  $[\text{M}]^+$  Calcd for  $\text{C}_{30}\text{H}_{34}\text{FNO}_7$ : 539.2319, found for  $\text{C}_{30}\text{H}_{34}\text{FNO}_7$ : 539.2303.

**diethyl-2-(4-(1-(tert-butoxycarbonyl)-7-fluoro-3-(2-methoxyphenyl)-2-oxoindolin-3-yl)but-2-en-1-yl)malonate (3m):**

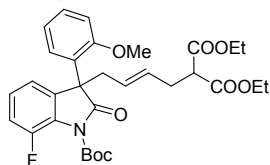

The title compound was prepared according to the general procedure as an oil liquid in 75% yield.  $^1\text{H}$  NMR (400 MHz,  $\text{CDCl}_3$ )  $\delta$  7.49 (d,  $J = 7.2$  Hz, 1H), 7.25 (t,  $J = 7.4$  Hz, 1H), 7.06 – 6.91 (m, 3H), 6.76 (d,  $J = 8.1$  Hz, 1H), 6.59 (m,  $J = 4.9, 3.3$  Hz, 1H), 5.36 (m,  $J = 7.3$  Hz, 1H), 5.19 (m,  $J = 7.5$  Hz, 1H), 4.13 (m,  $J = 7.0, 4.2$  Hz, 4H), 3.49 (s, 3H), 3.18 (t,  $J = 7.5$  Hz, 1H), 2.92 (m,  $J = 14.2, 7.1$  Hz, 2H), 2.43 (m,  $J = 26.1, 7.2$  Hz, 2H), 1.62 (s, 9H), 1.21 (t,  $J = 7.1$  Hz, 6H);  $^{13}\text{C}$  NMR (101 MHz,  $\text{CDCl}_3$ )  $\delta$  176.94, 168.80, 168.71, 156.68, 149.75, 148.00, 147.27, 135.47, 127.10, 124.89, 120.81, 115.69, 111.90, 84.12, 61.31, 55.58, 51.81, 43.49, 43.47, 39.93, 31.64, 29.68, 27.80, 14.04; MS (EI)  $[\text{M}]^+$  Calcd for  $\text{C}_{31}\text{H}_{36}\text{FNO}_8$ : 569.2425, found for  $\text{C}_{31}\text{H}_{36}\text{FNO}_8$ : 569.2409.

**diethyl-2-(4-(1-(tert-butoxycarbonyl)-7-fluoro-3-(4-fluorophenyl)-2-oxoindolin-3-yl)but-2-en-1-yl)malonate (3n):**

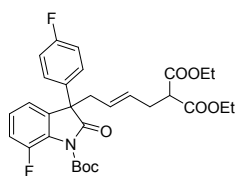

The title compound was prepared according to the general procedure as an oil liquid in 92% yield.  $^1\text{H}$  NMR (400 MHz,  $\text{CDCl}_3$ )  $\delta$  7.30 – 7.22 (m, 2H), 7.19 – 7.06 (m, 2H), 7.01 – 6.92 (m, 3H), 5.39 (m, 1H), 5.14 (m,  $J = 14.8, 7.5$  Hz, 1H), 4.14 – 4.04 (m, 4H), 3.17 (t,  $J = 7.5$  Hz, 1H), 2.93 (m,  $J = 12.9, 7.3$  Hz, 2H), 2.42 (m,  $J = 7.4$  Hz, 2H), 1.54 (s,  $J = 15.1$  Hz, 9H), 1.20 (td,  $J = 7.1, 2.3$  Hz, 6H);  $^{13}\text{C}$  NMR (101 MHz,  $\text{CDCl}_3$ )  $\delta$  175.58, 168.63, 163.46, 161.00, 150.00, 147.50, 147.36, 134.09, 134.06, 133.42, 131.82, 128.93, 126.76, 125.68, 125.34, 120.90, 120.87, 116.90, 116.69, 115.63, 115.41, 85.06, 61.34, 60.36, 56.88, 51.67, 41.52, 31.51, 27.63, 27.52, 21.01, 14.16, 14.01; MS (EI)  $[\text{M}]^+$  Calcd for  $\text{C}_{30}\text{H}_{33}\text{F}_2\text{NO}_7$ : 557.2225, found for  $\text{C}_{30}\text{H}_{33}\text{F}_2\text{NO}_7$ : 557.2248.

**diethyl-2-(4-(1-(tert-butoxycarbonyl)-3-(3-fluorophenyl)-5-methoxy-2-oxoindolin-3-yl)but-2-en-1-yl)malonate (3o):**

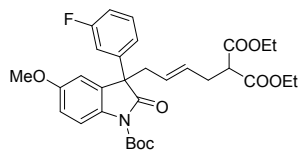

The title compound was prepared according to the general procedure as an oil liquid in 90% yield.  $^1\text{H}$  NMR (400 MHz,  $\text{CDCl}_3$ )  $\delta$  7.82 (d,  $J = 8.9$  Hz, 1H), 7.26 – 7.20 (m, 1H), 7.07 (ddd,  $J = 7.9, 1.5, 0.8$  Hz, 1H), 7.00 (dd,  $J = 10.5, 2.0$  Hz, 1H), 6.96 – 6.85 (m, 2H), 6.72 (d,  $J = 2.6$  Hz, 1H), 5.42 (s, 1H), 5.20 – 5.10 (m, 1H), 4.09 (m,  $J = 7.1, 6.4, 4.4, 1.9$  Hz, 4H), 3.78 (s, 3H), 3.16 (t,  $J = 7.5$  Hz, 1H), 2.92 (dd,  $J = 16.8, 7.1$  Hz, 2H), 2.41 (t,  $J = 7.5$  Hz, 2H), 1.59 (s, 9H), 1.21 – 1.16 (m, 6H);  $^{13}\text{C}$  NMR (101 MHz,  $\text{CDCl}_3$ )  $\delta$  175.70, 168.64, 161.54, 156.79, 149.11, 141.53, 141.46, 131.49, 130.01, 125.95, 122.97, 122.94, 116.18, 114.48, 114.46, 113.44, 111.20, 84.27, 61.30, 60.33, 56.79, 56.77, 55.61, 51.66, 41.17, 31.50, 29.65, 28.02, 21.00, 14.16, 14.00; MS (EI)  $[\text{M}]^+$  Calcd for  $\text{C}_{31}\text{H}_{36}\text{FNO}_8$ : 569.2425, found for  $\text{C}_{31}\text{H}_{36}\text{FNO}_8$ : 569.2451.

**diethyl-2-(4-(1-(tert-butoxycarbonyl)-2-oxo-3-(4-phenylbutyl)indolin-3-yl)but-2-en-1-yl)malonate (3p):**

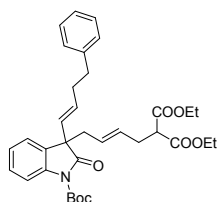

The title compound was prepared according to the general procedure as a white solid in 88% yield.  $^1\text{H}$  NMR (400 MHz,  $\text{CDCl}_3$ )  $\delta$  7.77 (d,  $J = 8.1$  Hz, 1H), 7.31 – 7.11 (m, 8H), 6.33 (d,  $J = 15.8$  Hz, 1H), 5.82 (m,  $J = 8.2$  Hz, 1H), 5.38 (m, 1H), 5.29 – 5.18 (m, 1H), 4.12 (m,  $J = 7.1, 4.6, 2.6$  Hz, 4H),

3.20 (t,  $J = 7.5$  Hz, 1H), 2.66 (m,  $J = 10.4, 4.3$  Hz, 2H), 2.55 (m,  $J = 13.5, 7.2$  Hz, 2H), 2.44 (m,  $J = 3.1$  Hz, 2H), 2.03 (s, 1H), 1.57 (s, 9H), 1.21 (td,  $J = 9.0, 6.0, 1.8$  Hz, 6H);  $^{13}\text{C}$  NMR (101 MHz,  $\text{CDCl}_3$ )  $\delta$  177.63, 168.74, 168.70, 149.02, 139.47, 137.00, 134.29, 130.71, 130.08, 128.83, 128.80, 128.35, 128.11, 127.28, 126.39, 126.18, 124.21, 123.28, 123.15, 114.93, 84.13, 61.32, 53.37, 51.84, 41.14, 40.37, 31.57, 27.99, 21.03, 14.18, 14.03; MS (EI)  $[\text{M}]^+$  Calcd for  $\text{C}_{34}\text{H}_{41}\text{NO}_7$ : 575.2883, found for  $\text{C}_{34}\text{H}_{41}\text{NO}_7$ : 575.2854.

**diethyl-2-(4-(1-(tert-butoxycarbonyl)-3-cyclohexyl-2-oxoindolin-3-yl)but-2-en-1-yl)malonate**

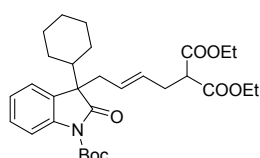

**(3q):**

The title compound was prepared according to the general procedure as an oil liquid in 91% yield.  $^1\text{H}$  NMR (400 MHz,  $\text{CDCl}_3$ )  $\delta$  7.75 (d,  $J = 8.1$  Hz, 1H), 7.22 (d,  $J = 8.4$  Hz, 1H), 7.11 (m,  $J = 6.7, 0.9$  Hz, 2H), 5.30 (m,  $J = 14.2, 6.9$  Hz, 1H), 5.13 – 5.03 (m, 1H), 3.10 (t,  $J = 7.5$  Hz, 1H), 2.52 (d,  $J = 7.2$  Hz, 2H), 2.35 (dd,  $J = 12.7, 6.6$  Hz, 2H), 1.87 – 1.74 (m, 1H), 1.73 – 1.48 (m, 14H), 1.21 – 0.78 (m, 11H);  $^{13}\text{C}$  NMR (101 MHz,  $\text{CDCl}_3$ )  $\delta$  178.14, 168.69, 168.65, 149.03, 139.90, 130.25, 127.66, 126.78, 123.89, 123.54, 114.50, 84.00, 61.22, 56.49, 51.88, 45.71, 38.20, 26.99, 26.06, 20.97, 13.99; MS (EI)  $[\text{M}]^+$  Calcd for  $\text{C}_{30}\text{H}_{41}\text{NO}_7$ : 527.2883, found for  $\text{C}_{30}\text{H}_{41}\text{NO}_7$ : 527.2866.

**diethyl-2-(4-(1-methyl-2-oxo-3-phenylindolin-3-yl)but-2-en-1-yl)malonate (3r):**

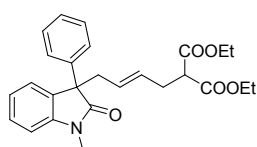

The title compound was prepared according to the general procedure as an oil liquid in 95% yield.  $^1\text{H}$  NMR (400 MHz,  $\text{CDCl}_3$ )  $\delta$  7.30 – 7.13 (m, 7H), 7.04 (t,  $J = 7.5$  Hz, 1H), 6.82 (d,  $J = 7.8$  Hz, 1H), 5.33 (dt,  $J = 14.1, 6.9$  Hz, 1H), 5.13 – 5.03 (m, 1H), 4.05 (m,  $J = 8.5, 4.3$  Hz, 4H), 3.14 (s,  $J = 2.7$  Hz, 3H), 3.09 (s,  $J = 7.6$  Hz, 1H), 2.88 (t,  $J = 14.4, 7.1$  Hz, 2H), 2.39 – 2.29 (m, 2H), 1.15 (td,  $J = 7.1, 2.1$  Hz, 6H);  $^{13}\text{C}$  NMR (101 MHz,  $\text{CDCl}_3$ )  $\delta$  177.88, 168.74, 168.73, 143.76, 139.35, 128.48, 127.03, 126.99, 125.18, 122.39, 108.20, 61.32, 56.41, 51.86, 40.62, 31.54, 26.34, 14.04; MS (EI)  $[\text{M}]^+$  Calcd for  $\text{C}_{26}\text{H}_{29}\text{NO}_5$ : 435.2046, found for  $\text{C}_{26}\text{H}_{29}\text{NO}_5$ : 435.2058.

**diethyl-2-(4-(1-benzyl-2-oxo-3-phenylindolin-3-yl)but-2-en-1-yl)malonate (3s):**

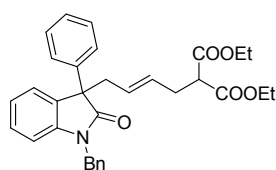

The title compound was prepared according to the general procedure as a white solid in 92% yield.  $^1\text{H}$  NMR (400 MHz,  $\text{CDCl}_3$ )  $\delta$  7.41 – 7.36 (m, 2H), 7.34 – 7.26 (m, 6H), 7.26 – 7.17 (m, 4H), 7.07 (td,  $J = 7.6, 1.0$  Hz, 1H), 6.77 (d,  $J = 7.8$  Hz, 1H), 5.51 – 5.41 (m, 1H), 5.25 – 5.15 (m, 1H), 5.00 (d,  $J = 15.7$  Hz, 1H), 4.83 (d,  $J = 15.7$  Hz, 1H), 4.17 – 4.08 (m, 4H), 3.16 (d,  $J = 7.6$  Hz, 1H), 3.05 (m,  $J = 7.1$  Hz, 2H), 2.50 – 2.33 (m, 2H), 1.23 (td,  $J = 12.4, 5.7, 3.5$  Hz, 6H);  $^{13}\text{C}$  NMR (101 MHz,  $\text{CDCl}_3$ )  $\delta$  176.35, 168.69, 168.66, 149.24, 131.02, 128.91, 128.53, 127.49, 127.23, 126.53, 125.59, 114.89, 84.07, 61.28, 61.26, 56.77, 51.80, 41.14, 29.66, 29.62, 28.05, 21.11, 14.09, 14.01; MS (EI)  $[\text{M}]^+$  Calcd for  $\text{C}_{32}\text{H}_{33}\text{NO}_5$ : 511.2359, found for  $\text{C}_{32}\text{H}_{33}\text{NO}_5$ : 511.2362.

**dimethyl-2-(4-(1-(tert-butoxycarbonyl)-2-oxo-3-phenylindolin-3-yl)but-2-en-1-yl)malonate**

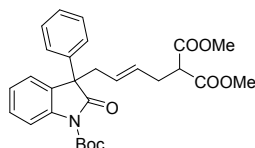

**(3u):**

The title compound was prepared according to the general procedure as a white solid in 91% yield.  $^1\text{H}$  NMR (400 MHz,  $\text{CDCl}_3$ )  $\delta$  7.83 (d,  $J$



= 8.2 Hz, 1H), 7.30 – 7.25 (m, 1H), 7.23 – 7.15 (m, 5H), 7.12 (m,  $J$  = 6.9, 1.0 Hz, 2H), 5.31 (m, 1H), 5.11 (m,  $J$  = 15.2, 7.2 Hz, 1H), 3.57 (d,  $J$  = 6.2 Hz, 6H), 3.13 (t,  $J$  = 7.5 Hz, 1H), 2.91 (m,  $J$  = 12.8, 7.1 Hz, 2H), 2.35 (t,  $J$  = 7.2 Hz, 2H), 1.54 (s,  $J$  = 5.0 Hz, 9H);  $^{13}\text{C}$  NMR (101 MHz,  $\text{CDCl}_3$ )  $\delta$  176.20, 169.06, 169.04, 149.19, 139.78, 139.05, 130.95, 130.24, 128.57, 128.43, 127.59, 127.21, 126.64, 125.23, 124.31, 115.14, 84.33, 56.66, 52.47, 51.43, 41.25, 31.58, 29.67, 28.03, 21.04, 14.18; MS (EI)  $[M]^+$  Calcd for  $\text{C}_{28}\text{H}_{31}\text{NO}_7$ : 493.2101, found for  $\text{C}_{28}\text{H}_{31}\text{NO}_7$ : 493.2115.

**bis(2,2,2-trifluoroethyl)-2-(4-(1-(tert-butoxycarbonyl)-2-oxo-3-phenylindolin-3-yl)but-2-en-1-yl)malonate (3v):**

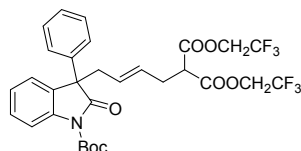

The title compound was prepared according to the general procedure as an oil liquid in 87% yield.  $^1\text{H}$  NMR (400 MHz,  $\text{CDCl}_3$ )  $\delta$  7.84 (d,  $J$  = 8.2 Hz, 1H), 7.31 – 7.11 (m, 8H), 5.33 (m, 1H), 5.20 – 5.08 (m, 1H), 4.43 – 4.28 (m, 4H), 3.33 (t,  $J$  = 7.4 Hz, 1H), 2.99 (m,  $J$  = 7.8 Hz, 1H), 2.87 (m, 1H), 2.42 (t,  $J$  = 7.2 Hz, 2H), 1.54 (s, 9H);  $^{13}\text{C}$  NMR (101 MHz,  $\text{CDCl}_3$ )  $\delta$  176.11, 166.23, 149.19, 139.83, 139.09, 130.18, 129.58, 128.62, 128.49, 127.89, 127.66, 127.13, 125.10, 124.38, 115.16, 84.44, 56.65, 50.71, 41.10, 31.24, 28.00; MS (EI)  $[M]^+$  Calcd for  $\text{C}_{30}\text{H}_{29}\text{F}_6\text{NO}_7$ : 629.1848, found for  $\text{C}_{30}\text{H}_{29}\text{F}_6\text{NO}_7$ : 629.1852.

**tert-butyl-3-(5-cyano-6-methoxy-6-oxohex-2-en-1-yl)-2-oxo-3-phenylindoline-1-carboxylate (3w):**

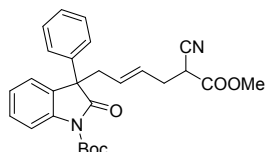

The title compound was prepared according to the general procedure as a white solid in 96% yield.  $^1\text{H}$  NMR (400 MHz,  $\text{CDCl}_3$ )  $\delta$  7.92 (dd,  $J$  = 8.2, 3.0 Hz, 1H), 7.42 – 7.21 (m, 8H), 5.54 – 5.42 (m, 1H), 5.38 – 5.26 (m, 1H), 3.75 (t,  $J$  = 13.3 Hz, 3H), 3.30 (s, 1H), 3.10 (s, 1H), 3.05 – 2.93 (m, 1H), 2.45 (t,  $J$  = 7.2 Hz, 2H), 1.61 (s, 9H);  $^{13}\text{C}$  NMR (101 MHz,  $\text{CDCl}_3$ )  $\delta$  176.13, 176.09, 165.82, 165.74, 149.14, 139.79, 139.00, 138.97, 128.64, 127.68, 124.48, 124.43, 115.79, 115.76, 115.29, 84.39, 56.60, 56.58, 53.46, 41.20, 37.40, 37.25, 32.50, 28.04, 21.03, 14.19; MS (EI)  $[M]^+$  Calcd for  $\text{C}_{27}\text{H}_{28}\text{N}_2\text{O}_5$ : 460.1998, found for  $\text{C}_{27}\text{H}_{28}\text{N}_2\text{O}_5$ : 460.1992.

**tert-butyl-3-(5-cyano-5-(phenylsulfonyl)pent-2-en-1-yl)-2-oxo-3-phenylindoline-1-carboxylate (3x):**

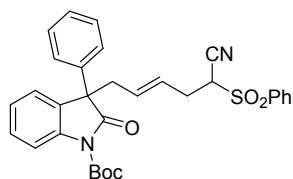

The title compound was prepared according to the general procedure as a white solid in 83% yield.  $^1\text{H}$  NMR (400 MHz,  $\text{CDCl}_3$ )  $\delta$  7.98 – 7.84 (m, 3H), 7.75 (s, 1H), 7.62 (t,  $J$  = 7.7 Hz, 2H), 7.37 – 7.20 (m, 8H), 5.43 (m,  $J$  = 15.0, 7.5 Hz, 1H), 5.35 (m,  $J$  = 7.0 Hz, 1H), 3.68 (m,  $J$  = 24.0, 11.0, 4.1 Hz, 1H), 3.13 (td,  $J$  = 13.8, 7.6 Hz, 1H), 3.01 – 2.92 (m, 1H), 2.73 (m,  $J$  = 8.7, 5.2 Hz, 1H), 2.38 (m,  $J$  = 11.8, 7.9 Hz, 1H), 1.58 (d,  $J$  = 9.0 Hz, 9H);  $^{13}\text{C}$  NMR (101 MHz,  $\text{CDCl}_3$ )  $\delta$  176.11, 176.06, 149.09, 149.04, 138.93, 135.38, 135.29, 128.68, 124.49, 115.36, 113.46, 113.41, 84.52, 57.22, 57.06, 56.66, 56.60, 41.22, 41.12, 29.75, 28.02, 21.05, 14.20; MS (EI)  $[M]^+$  Calcd for  $\text{C}_{31}\text{H}_{30}\text{N}_2\text{O}_5\text{S}$ : 542.1875, found for  $\text{C}_{31}\text{H}_{30}\text{N}_2\text{O}_5\text{S}$ : 542.1890.

## 6 Asymmetric allyllation reaction:

The general procedure was followed: oxindole (30.9 mg, 0.10 mmol), catalyst  $\text{Pd}_2(\text{dba})_3$ , ligands, and THF (1 mL). The product was isolated by column chromatography (hexanes/EA : 1/20) as white oil (50.5mg; 80% yield). HPLC analysis: [Daicel CHIRALPAK AD-H column; solvent system: 0.5% isopropanol/99.5% hexanes; 1.0 mL/min; retention times: 34.2 min (major), 41.5 min (minor)].

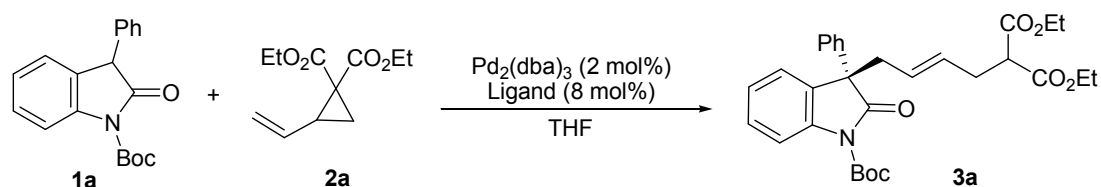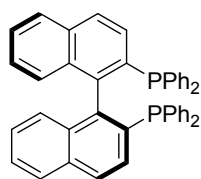

**P-1**  
no reaction

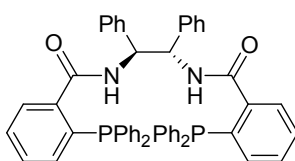

**P-2**  
no reaction

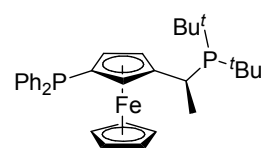

**P-3**  
35%,<sup>b</sup> 7% ee<sup>c</sup>

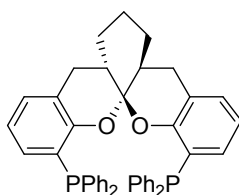

**P-4 (SKP)**  
99%, 25% ee  
75%, 35% ee (at -25 °C)

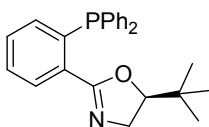

**P-5**  
74%, 15% ee

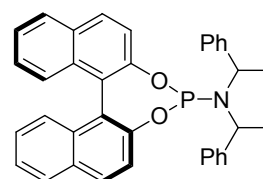

**P-6**  
no reaction

## 7 $^1\text{H}$ and $^{13}\text{C}$ NMR spectras for all compounds

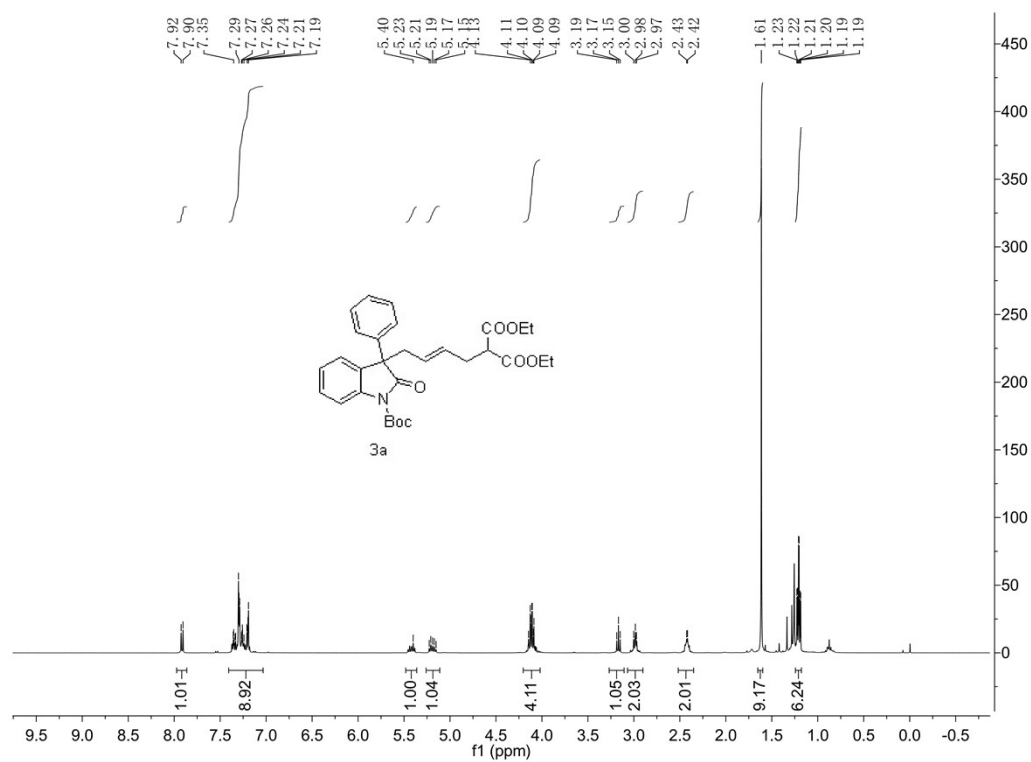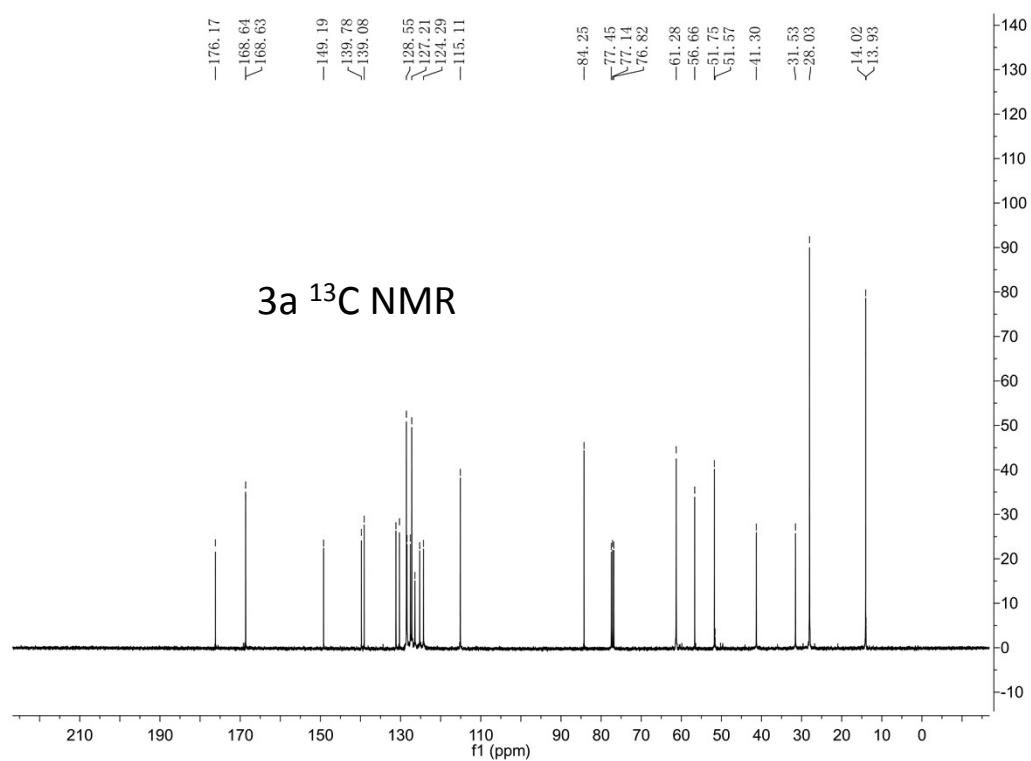

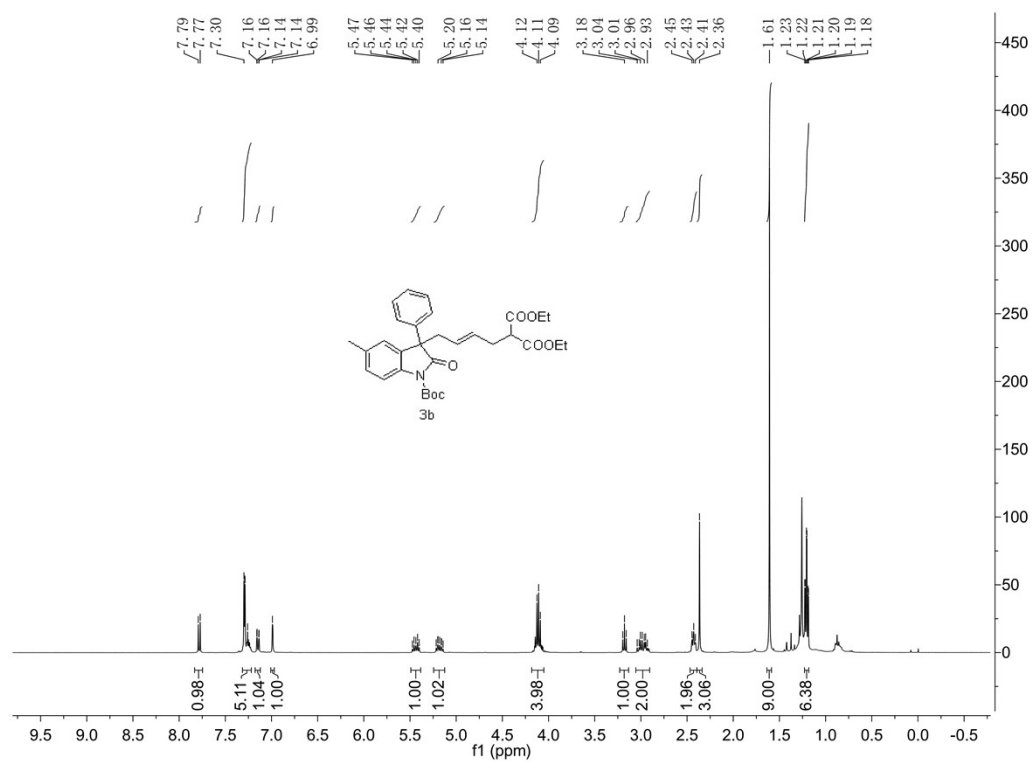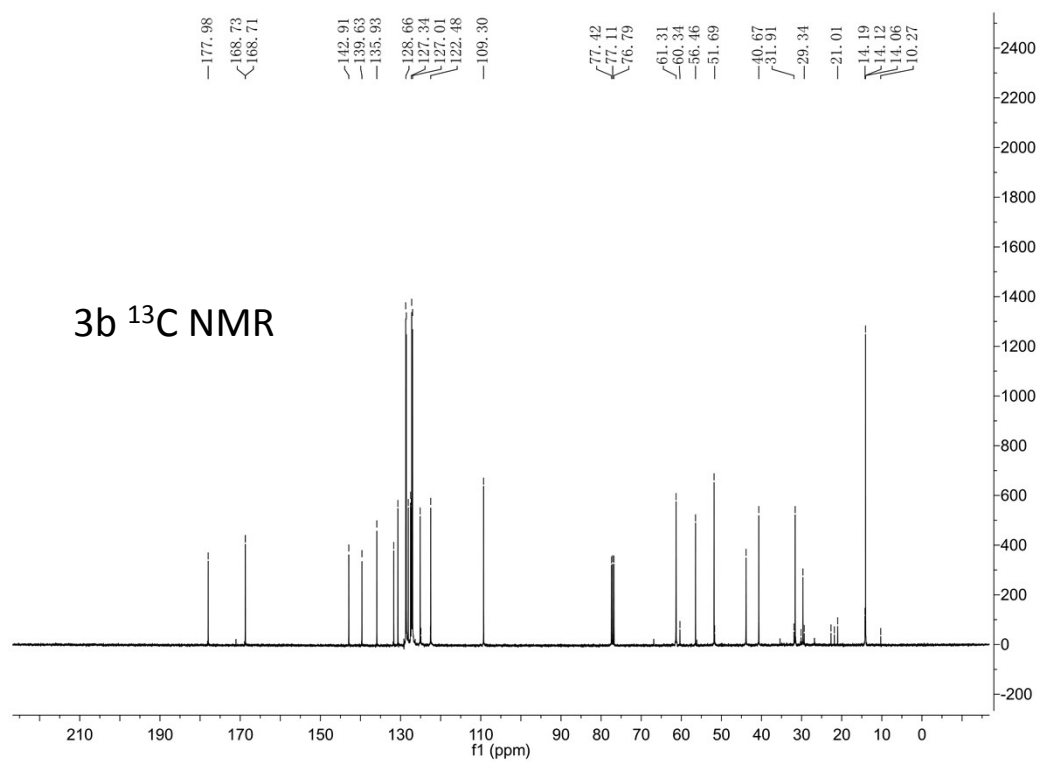

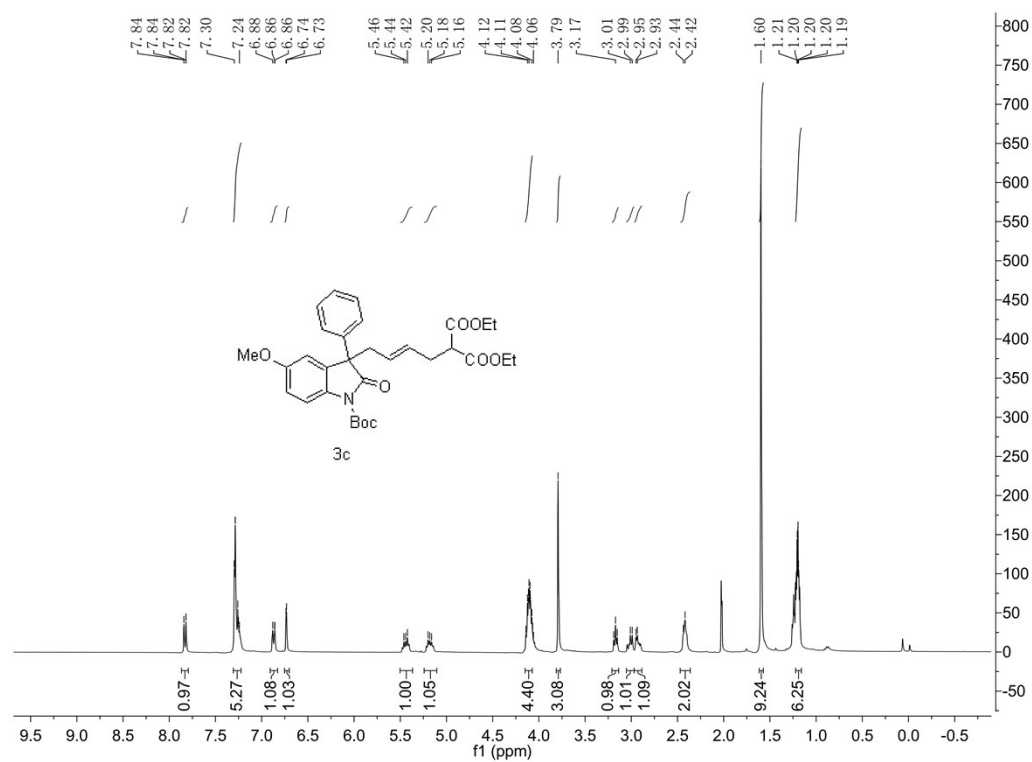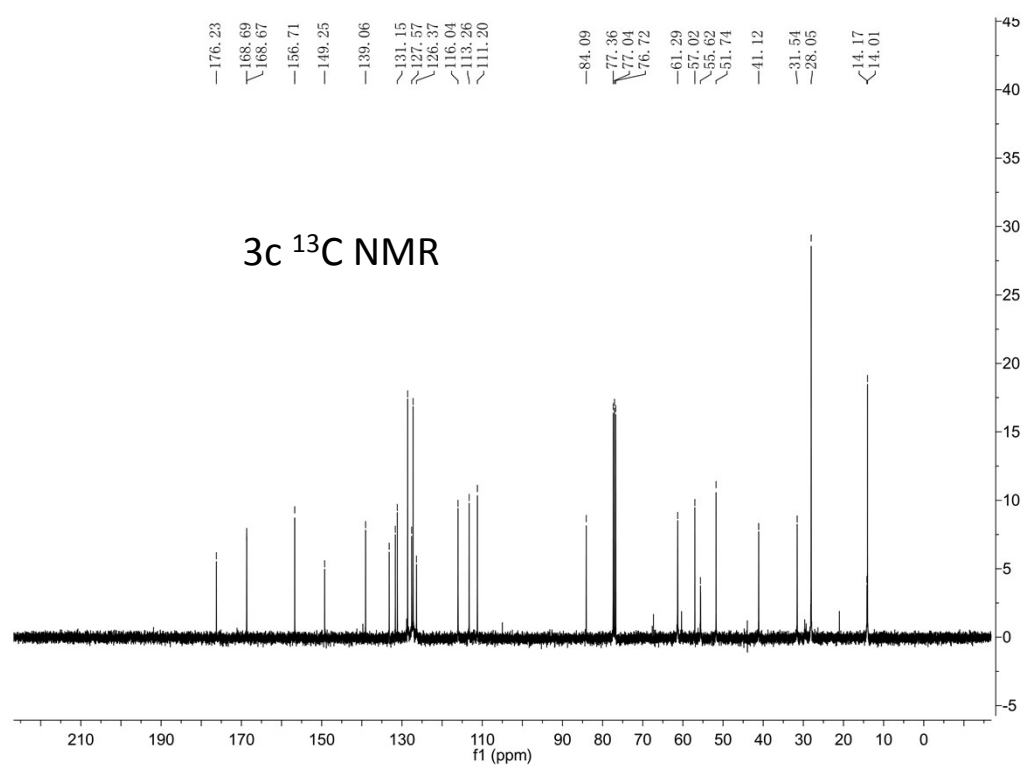

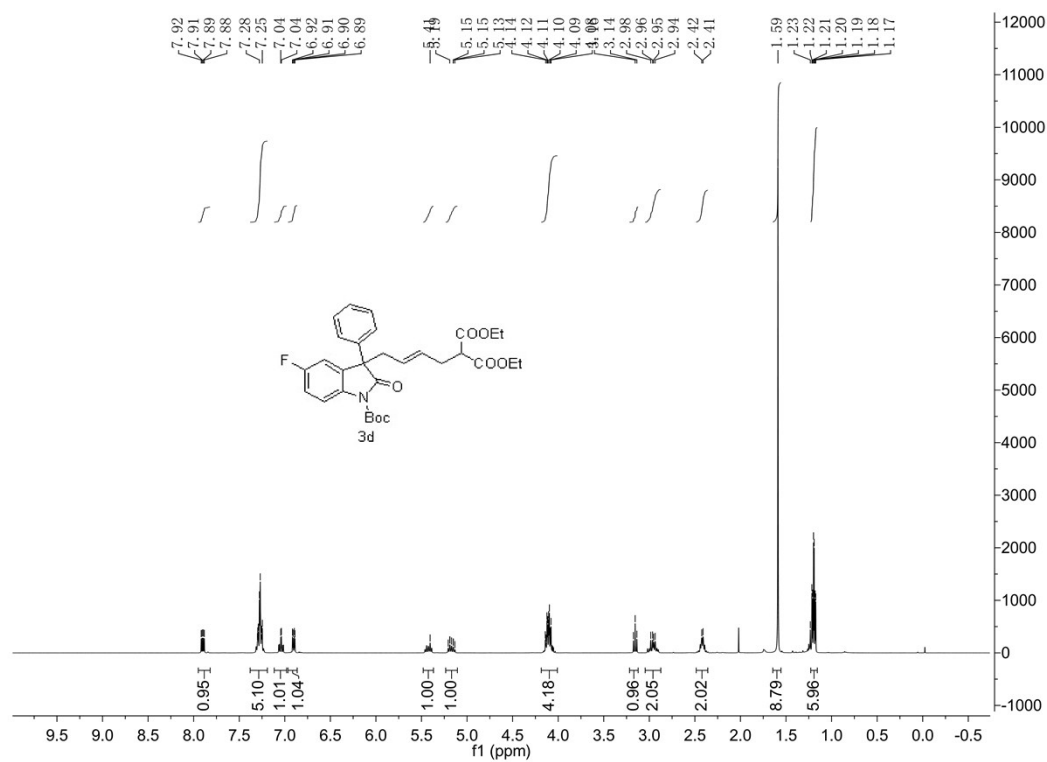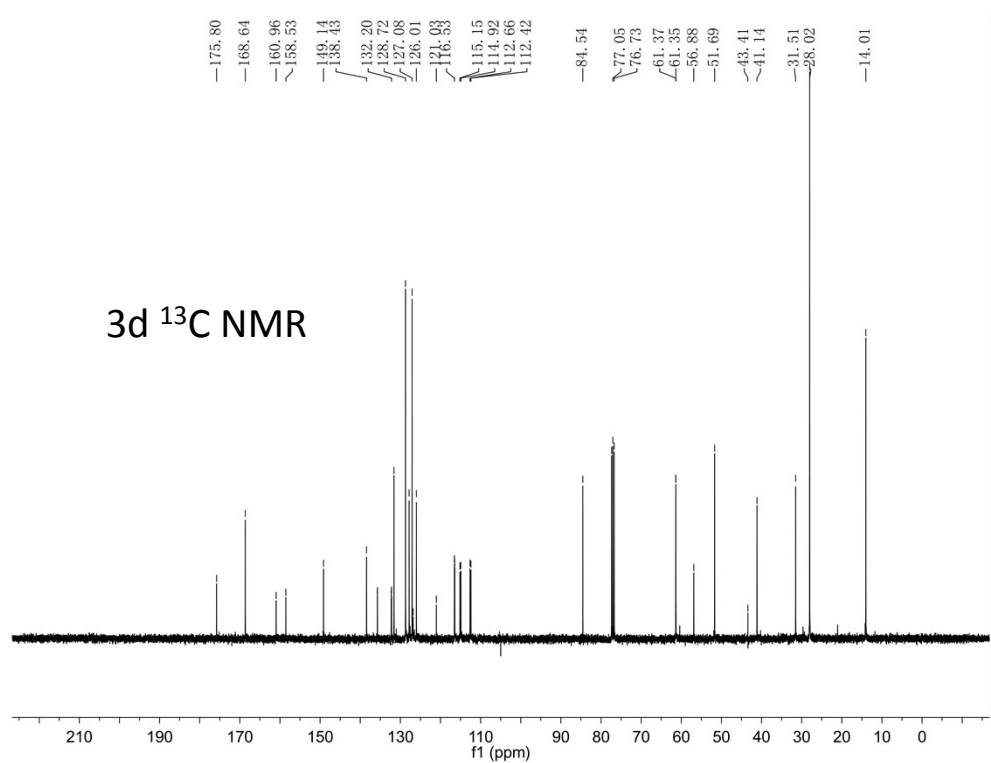

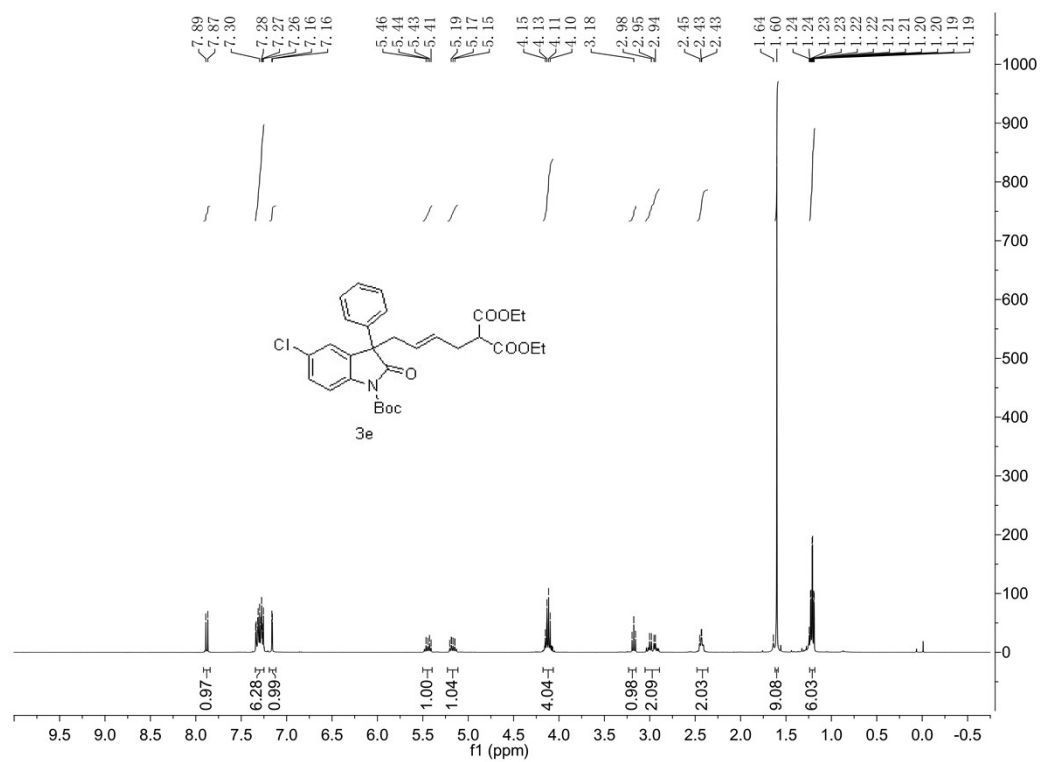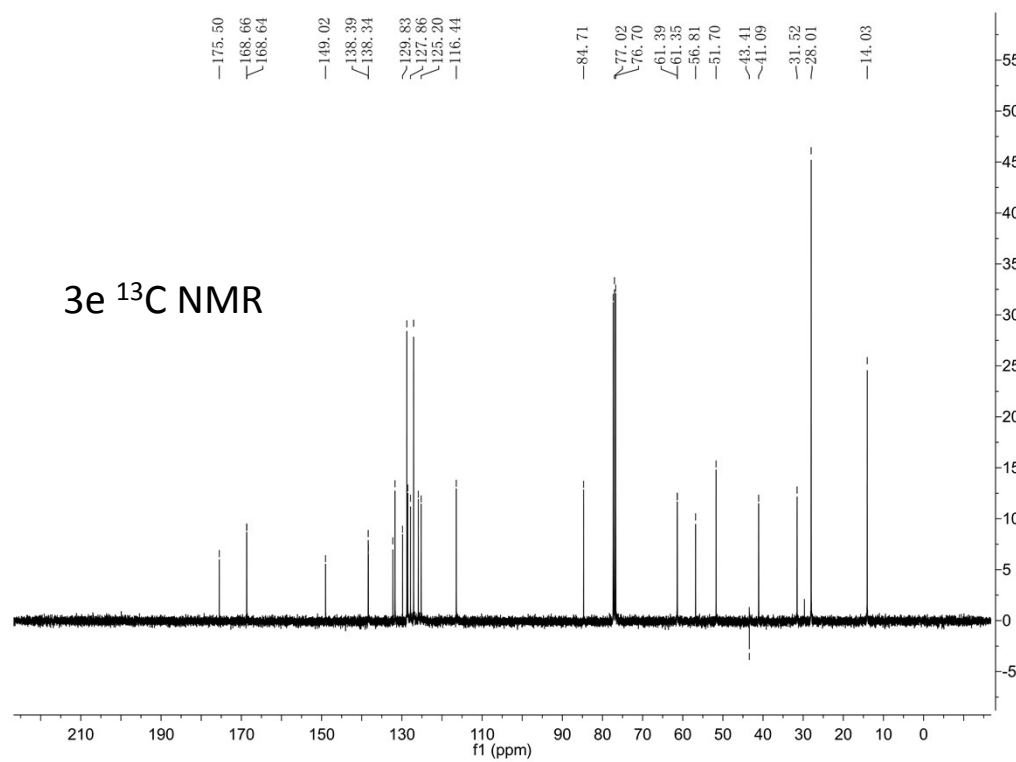

3e <sup>13</sup>C NMR

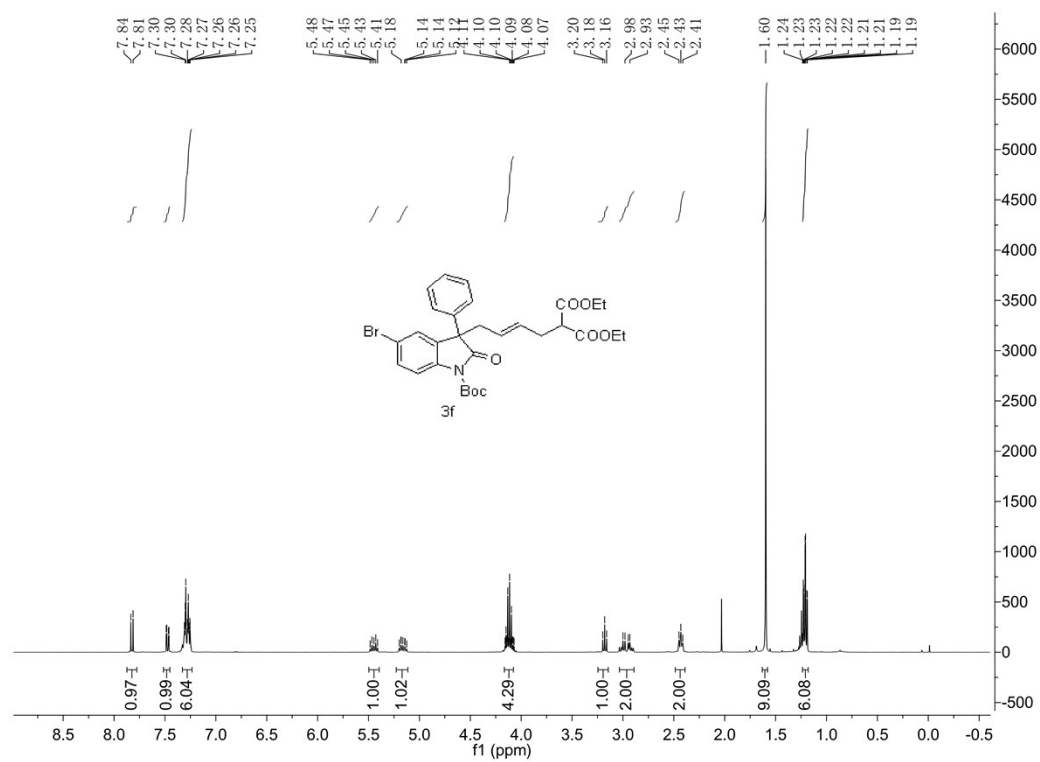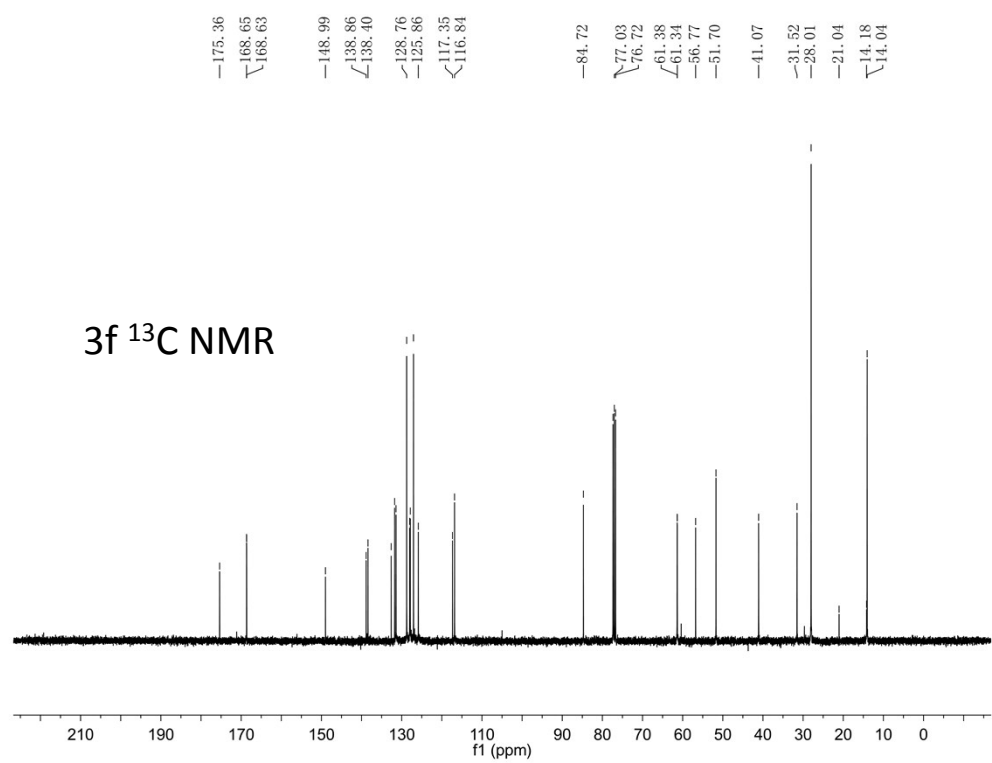



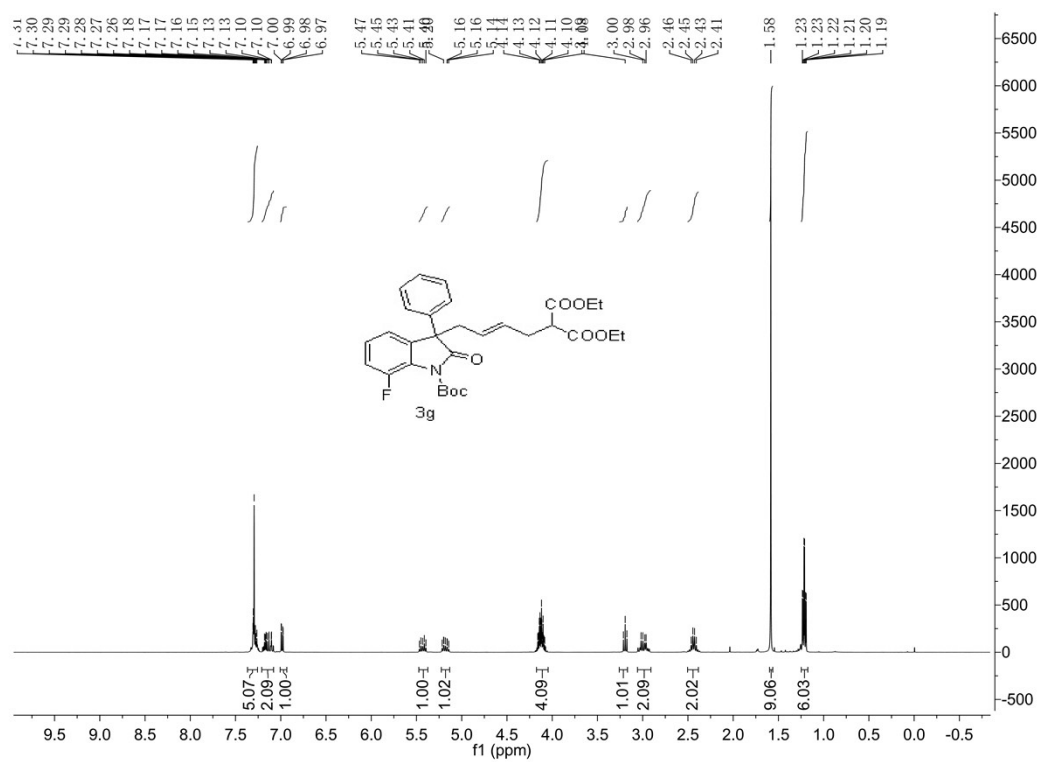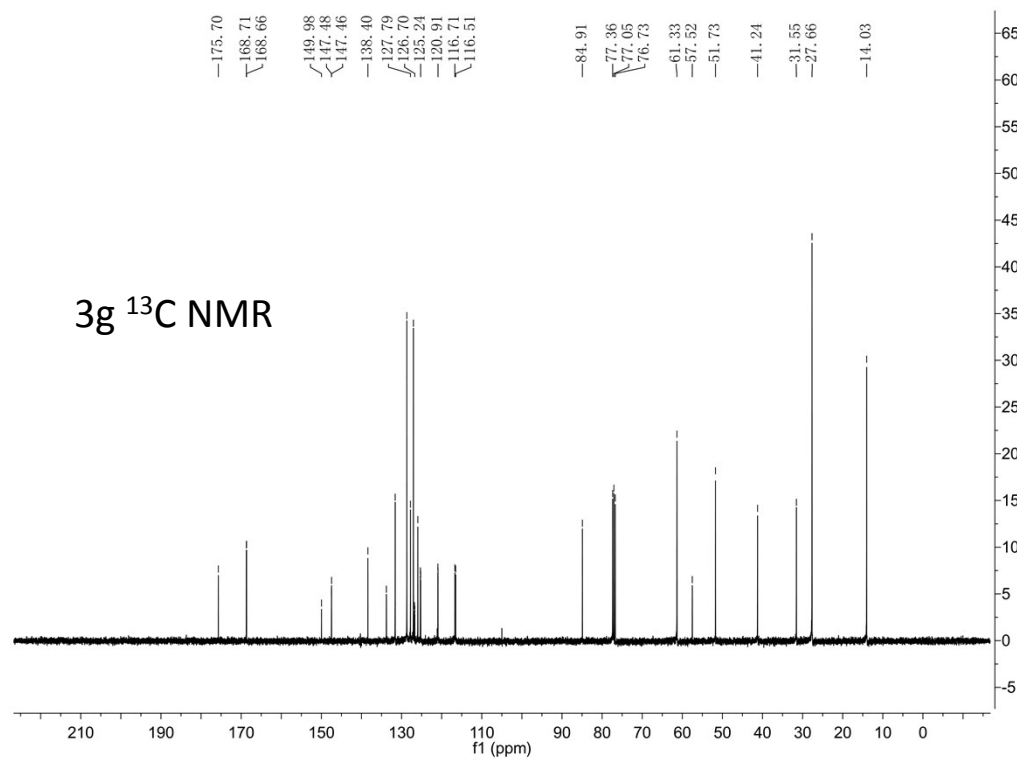

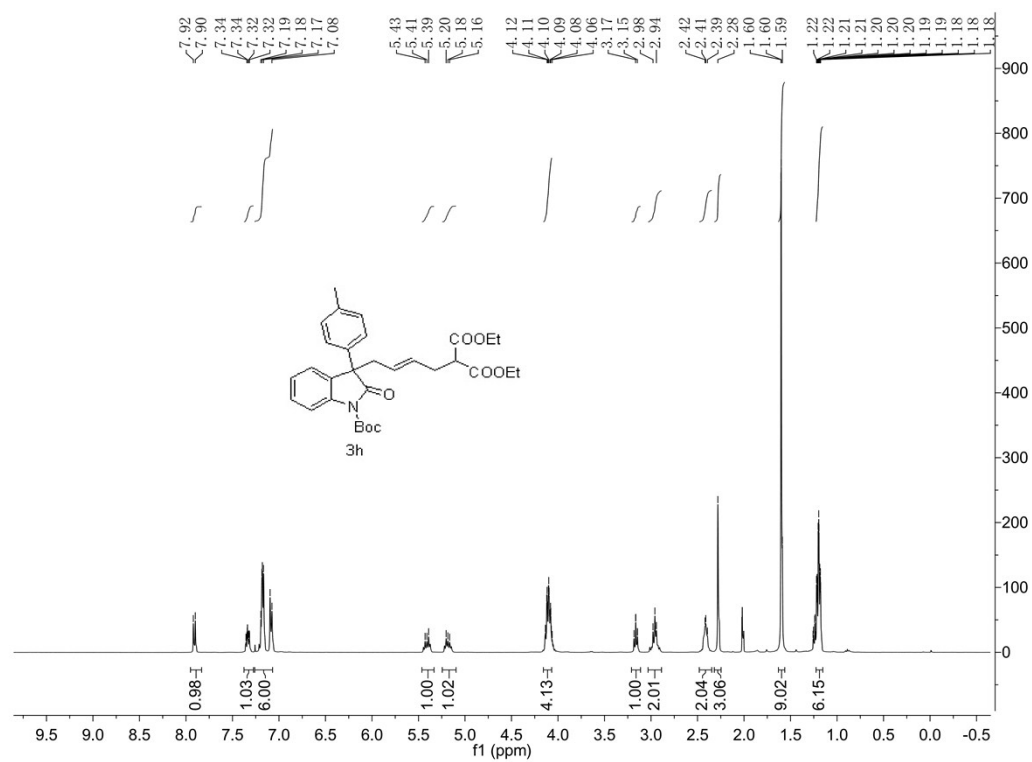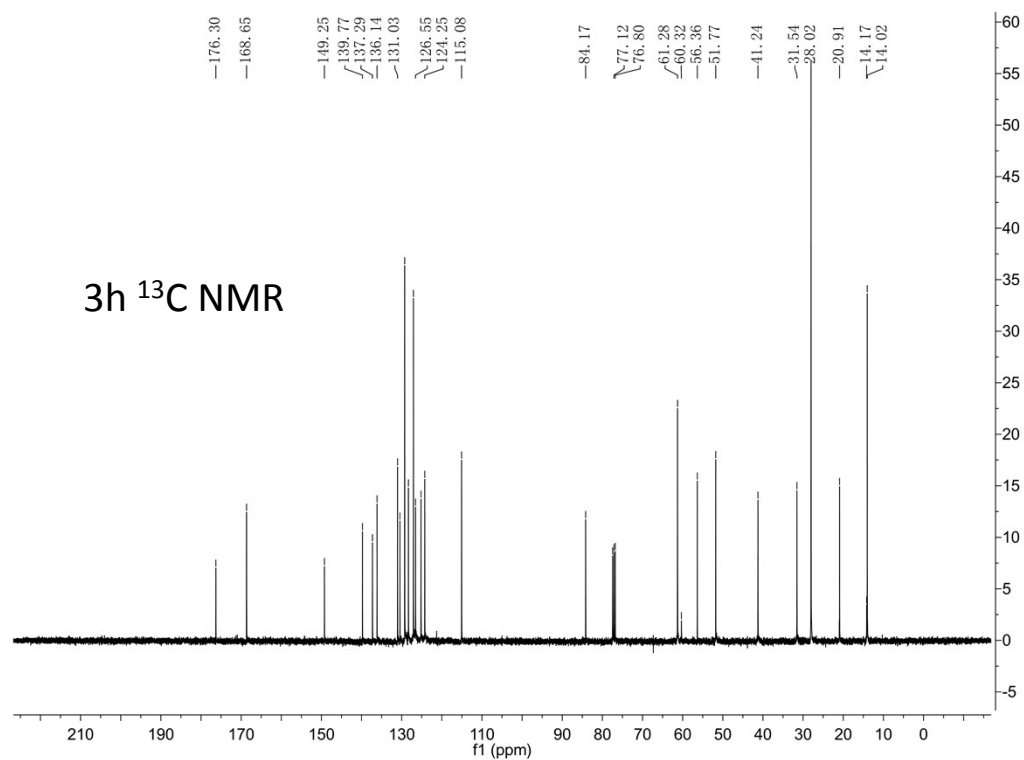

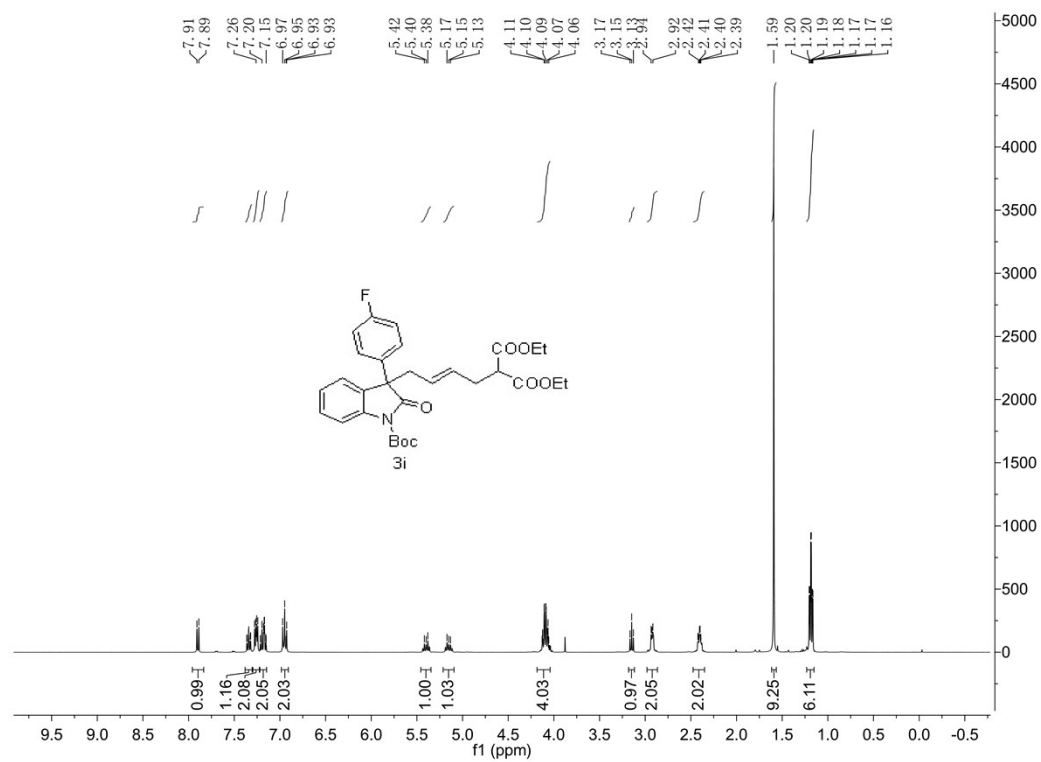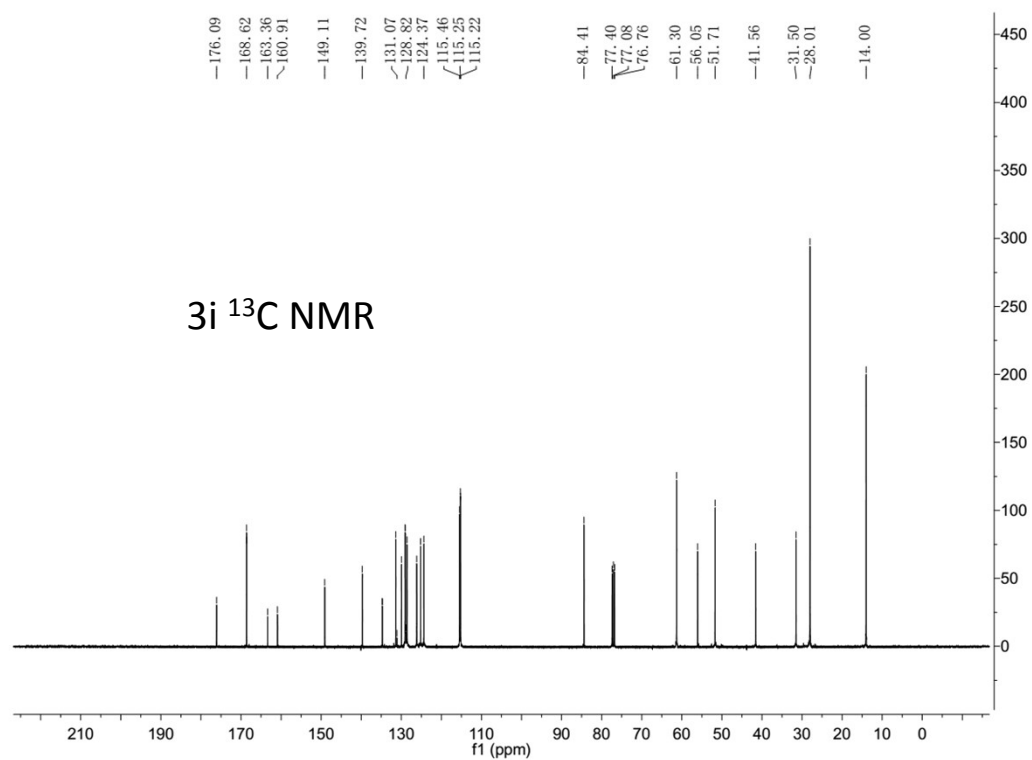

3i <sup>13</sup>C NMR

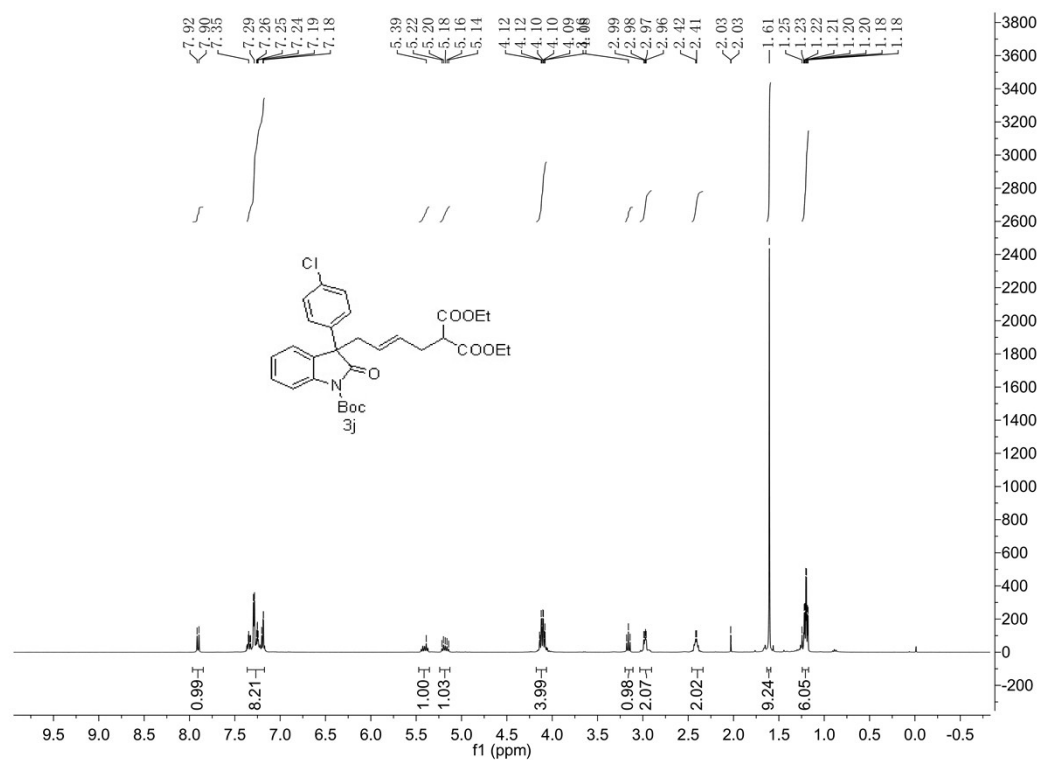

3j <sup>13</sup>C NMR

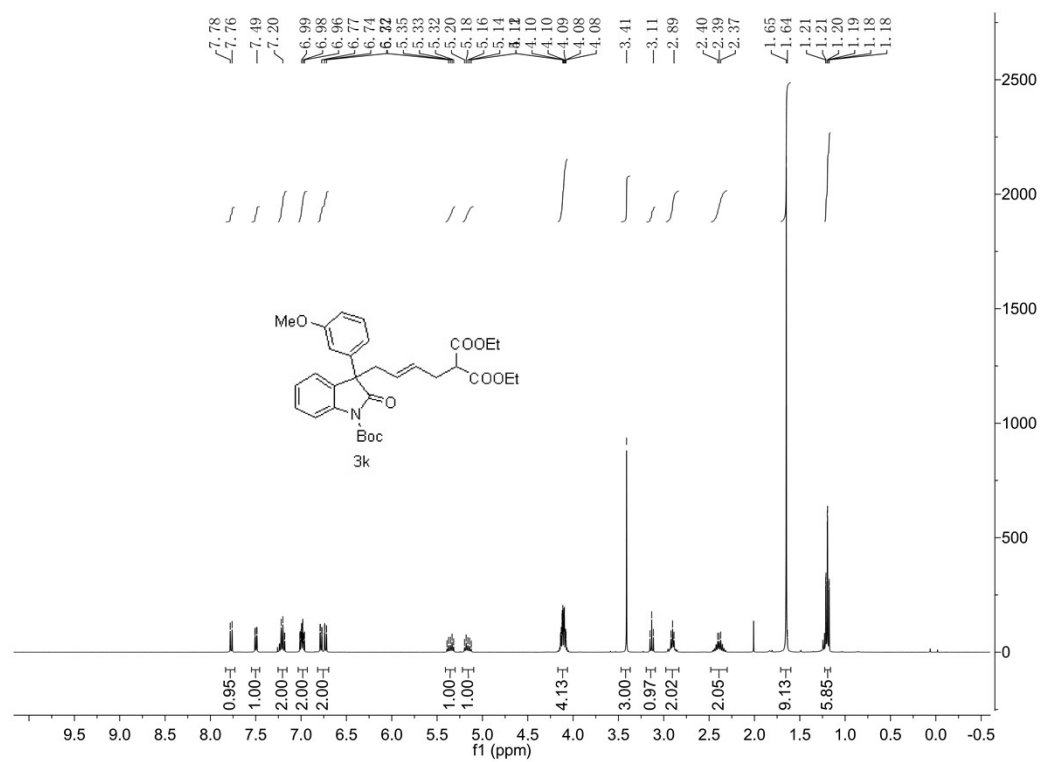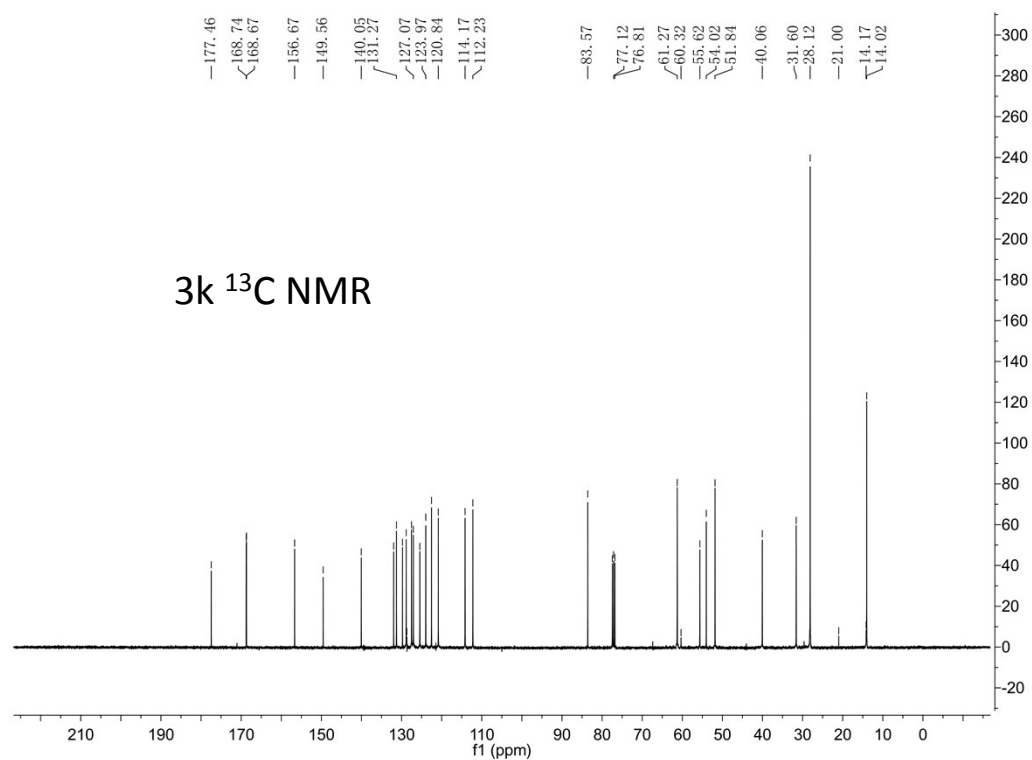



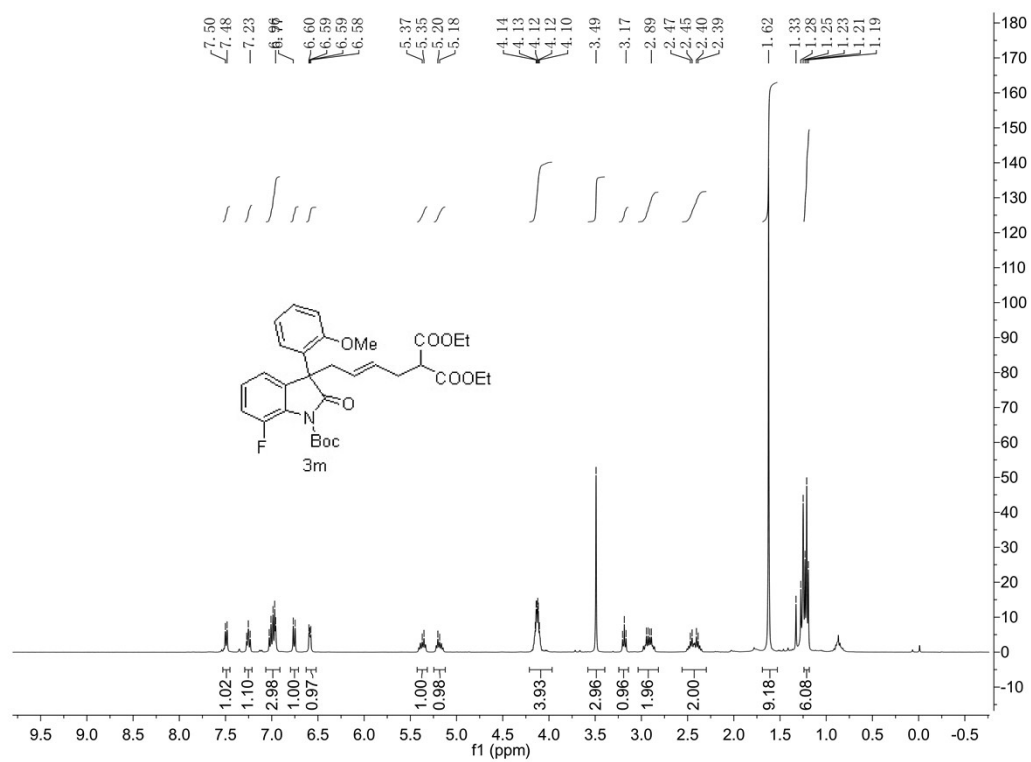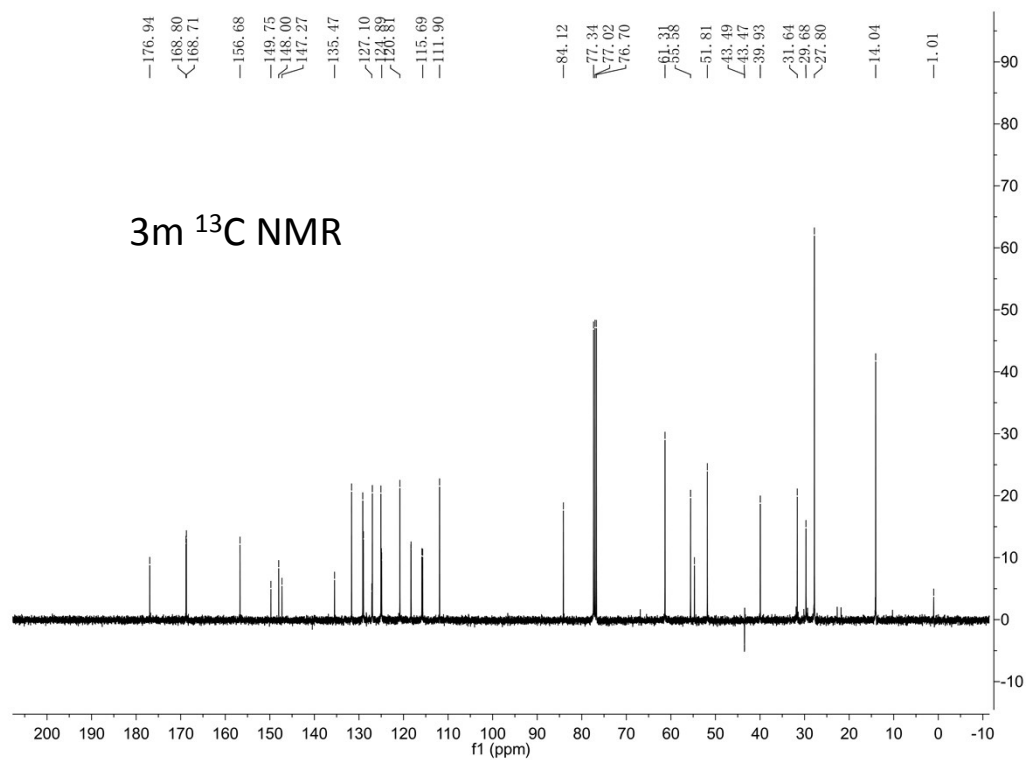

**3m <sup>13</sup>C NMR**

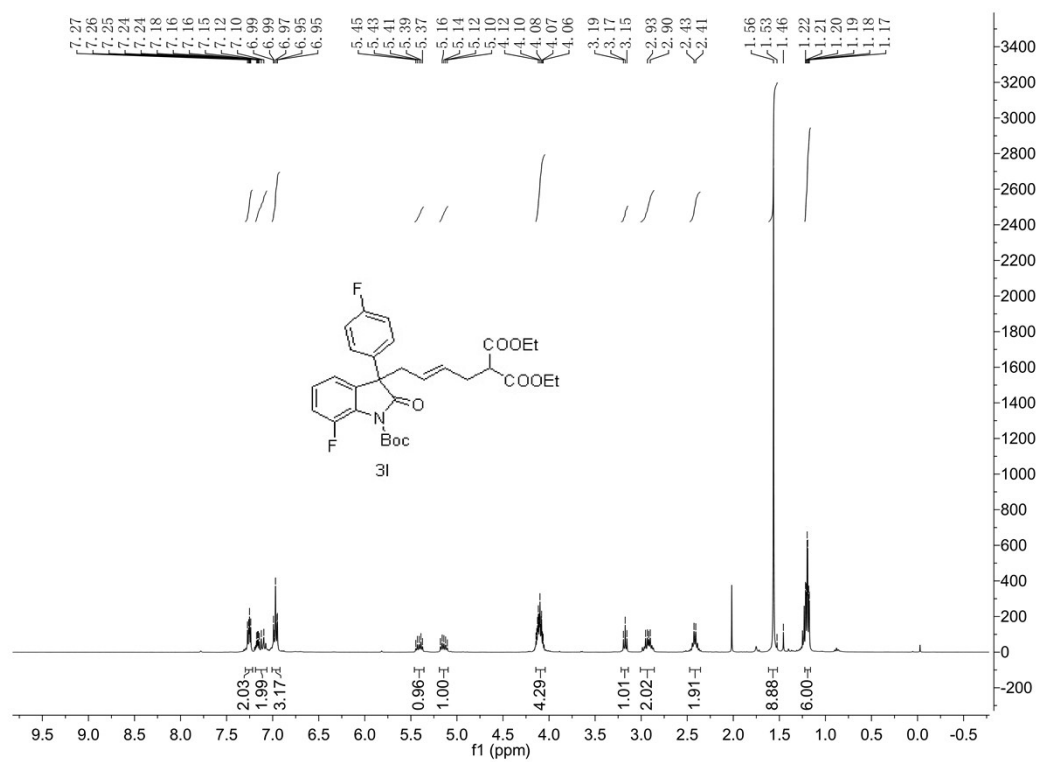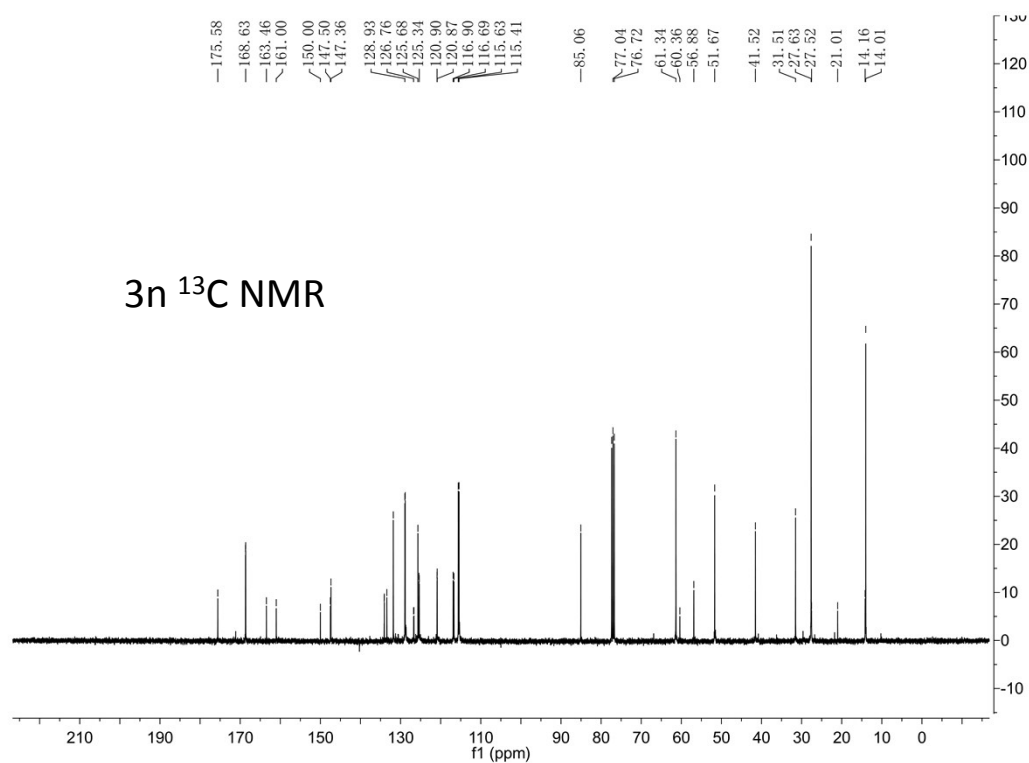



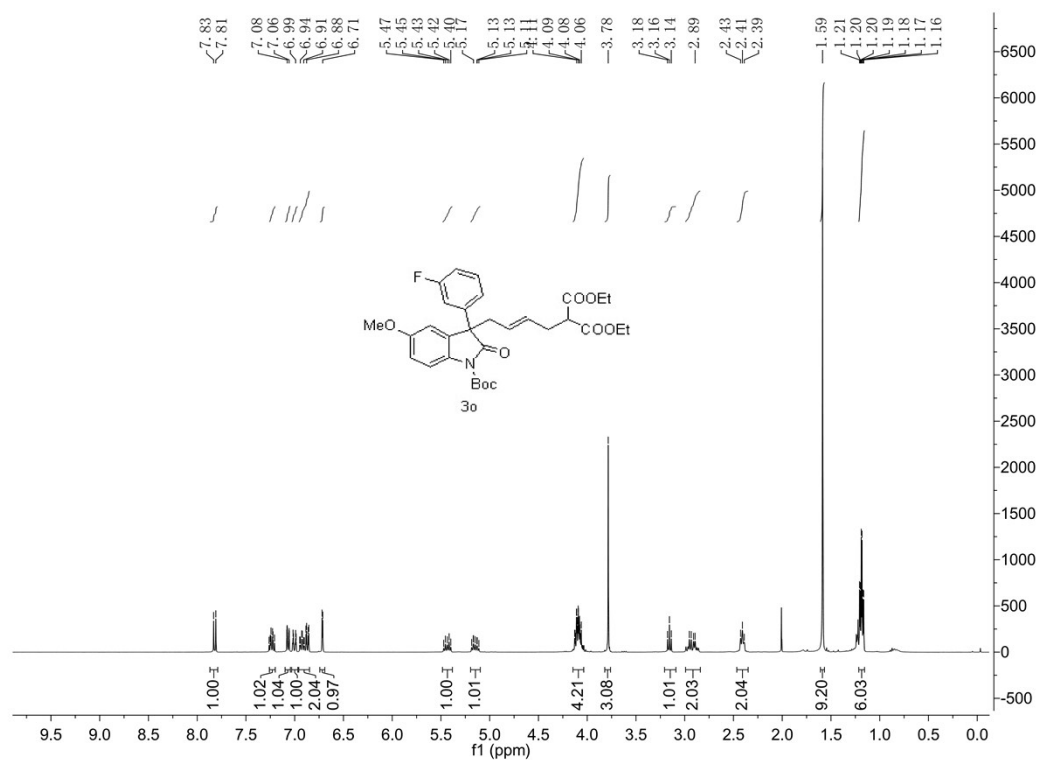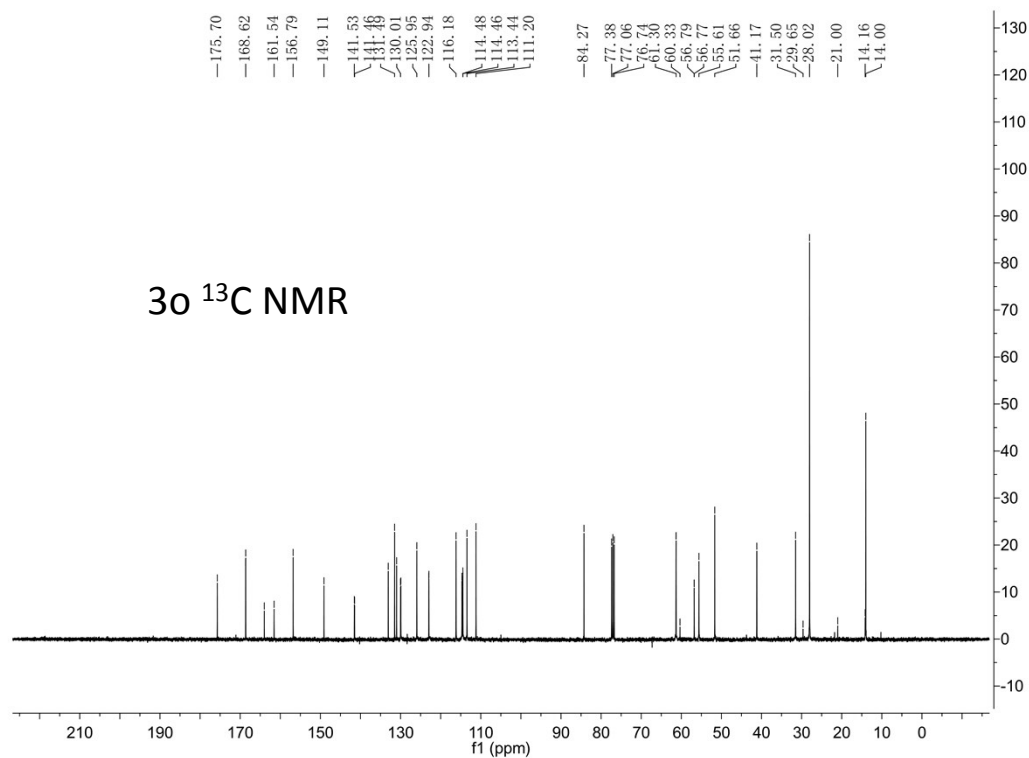

3o <sup>13</sup>C NMR

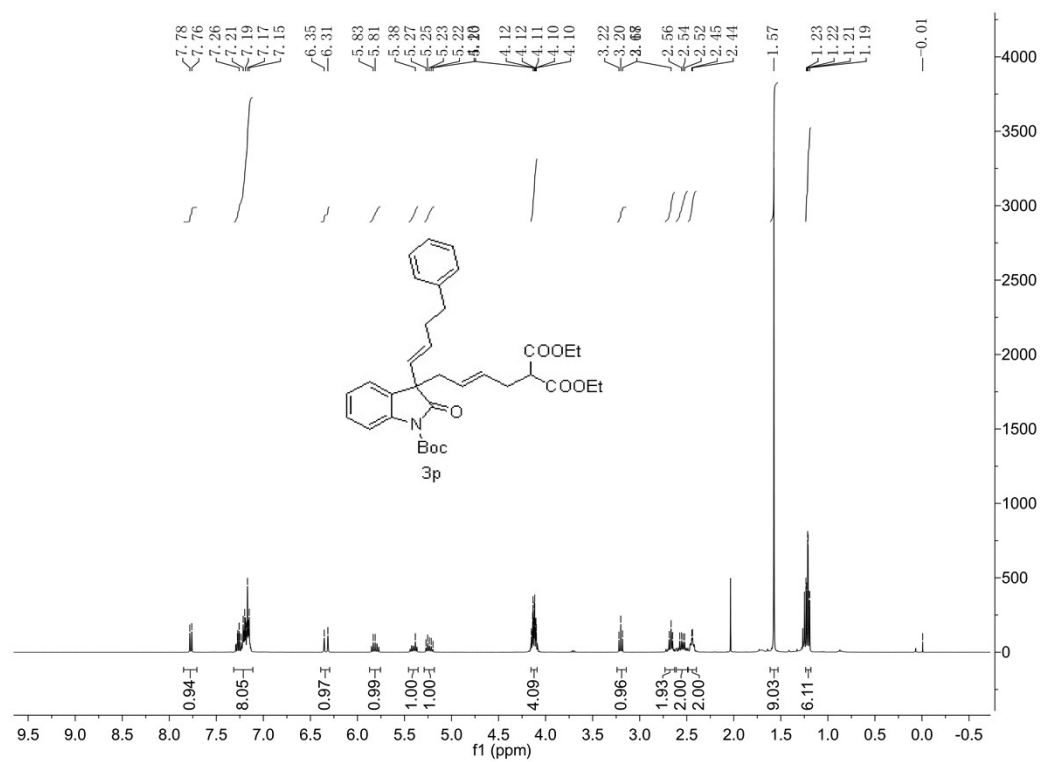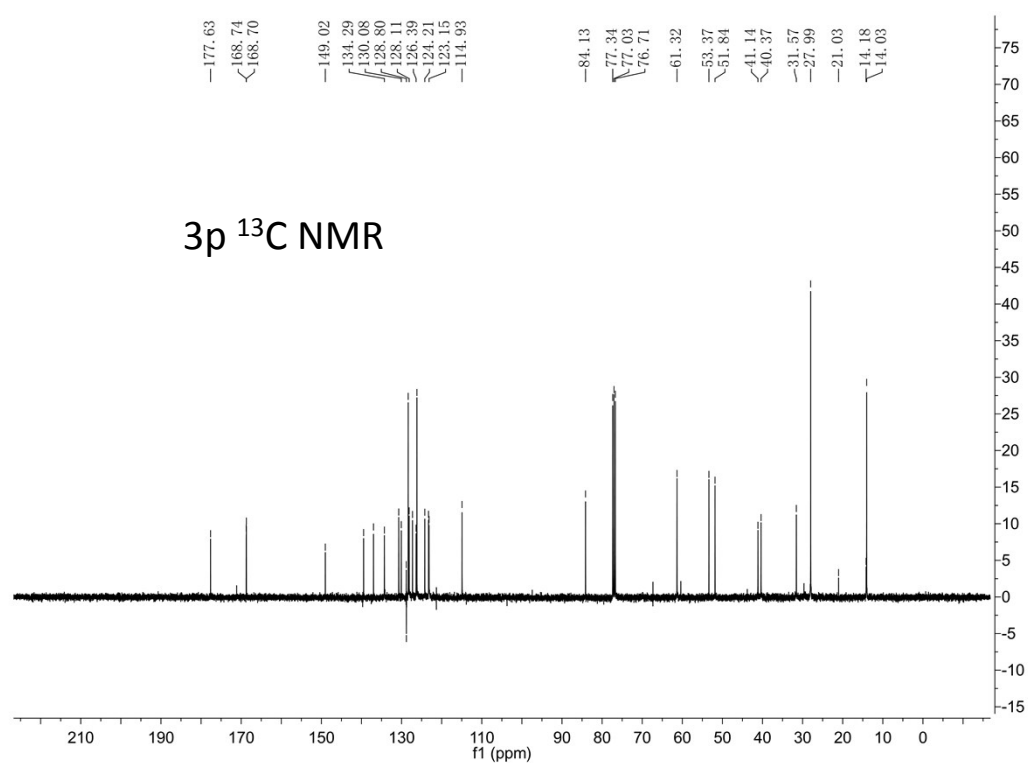

3p <sup>13</sup>C NMR

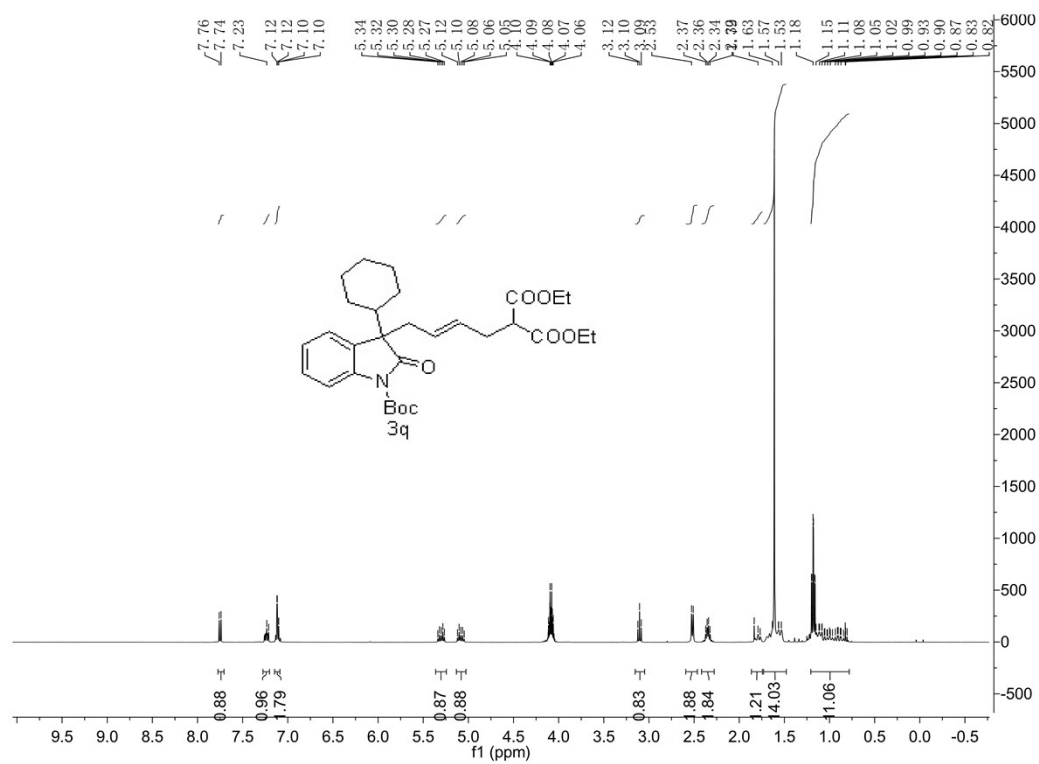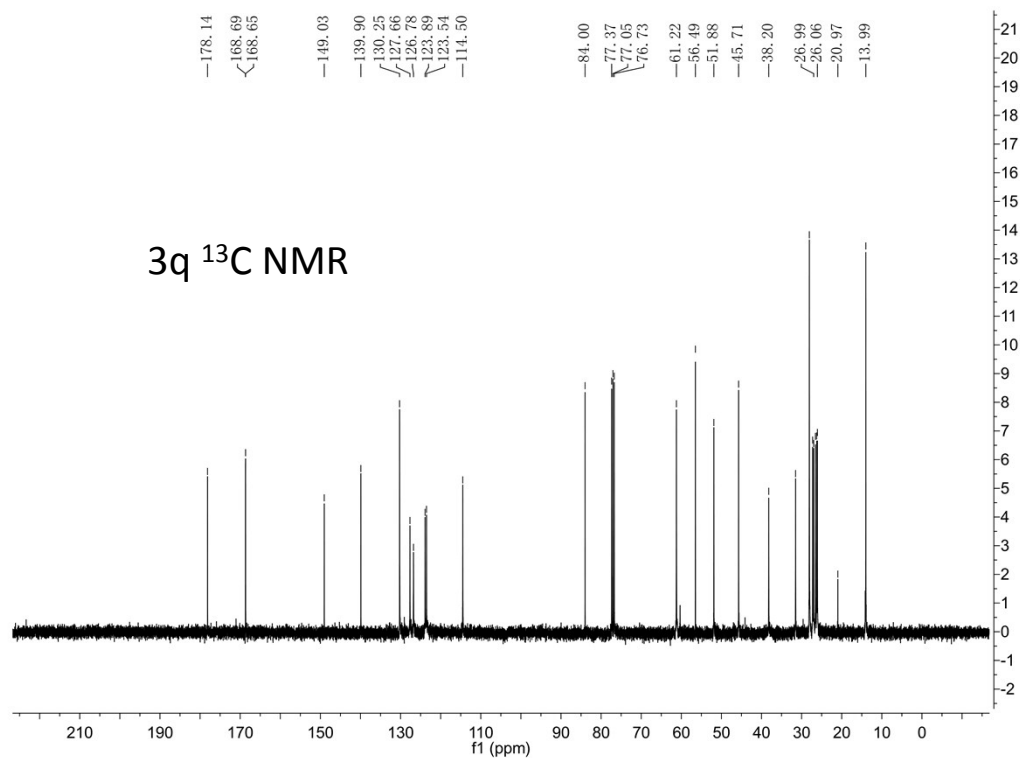

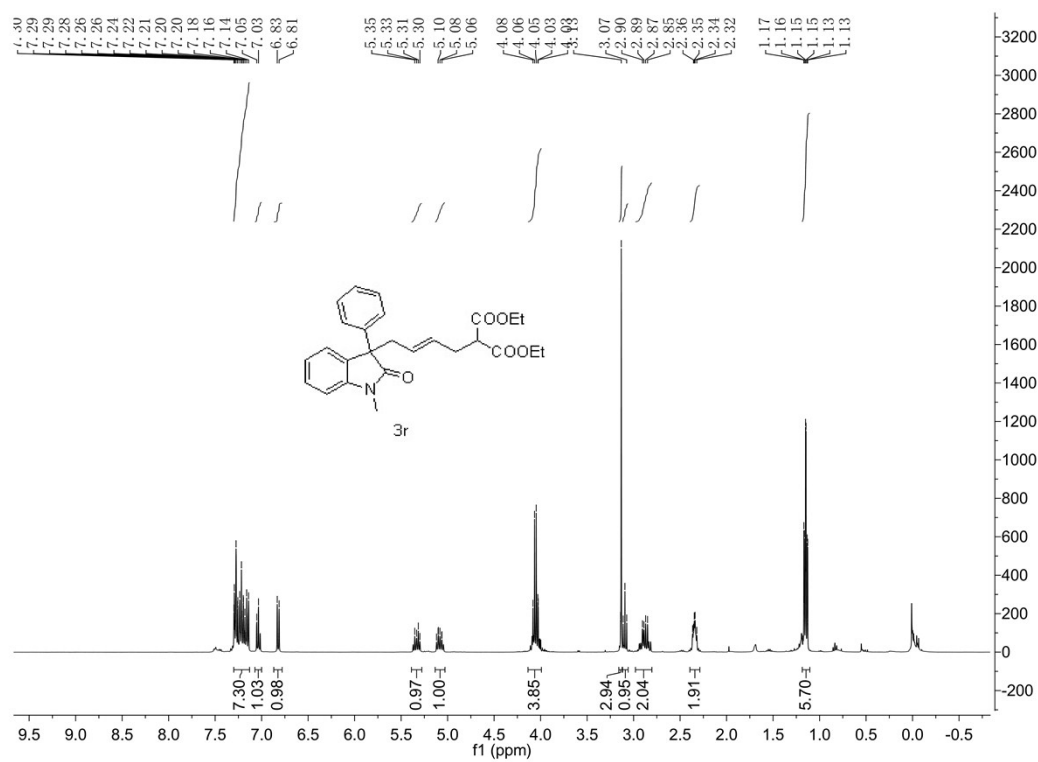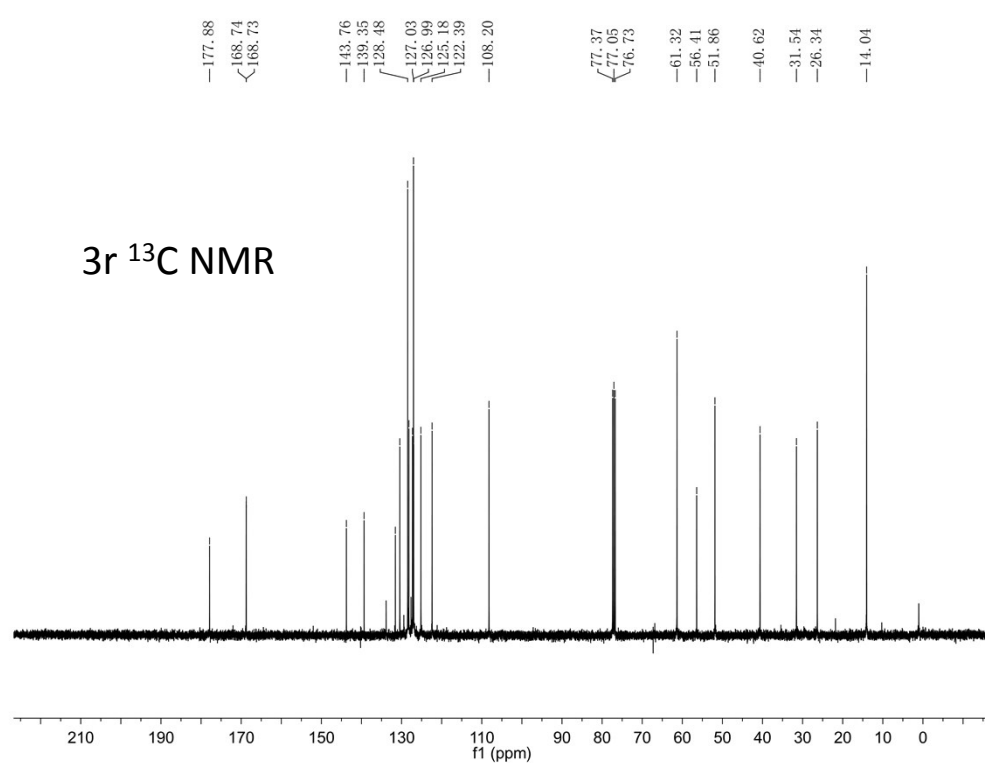

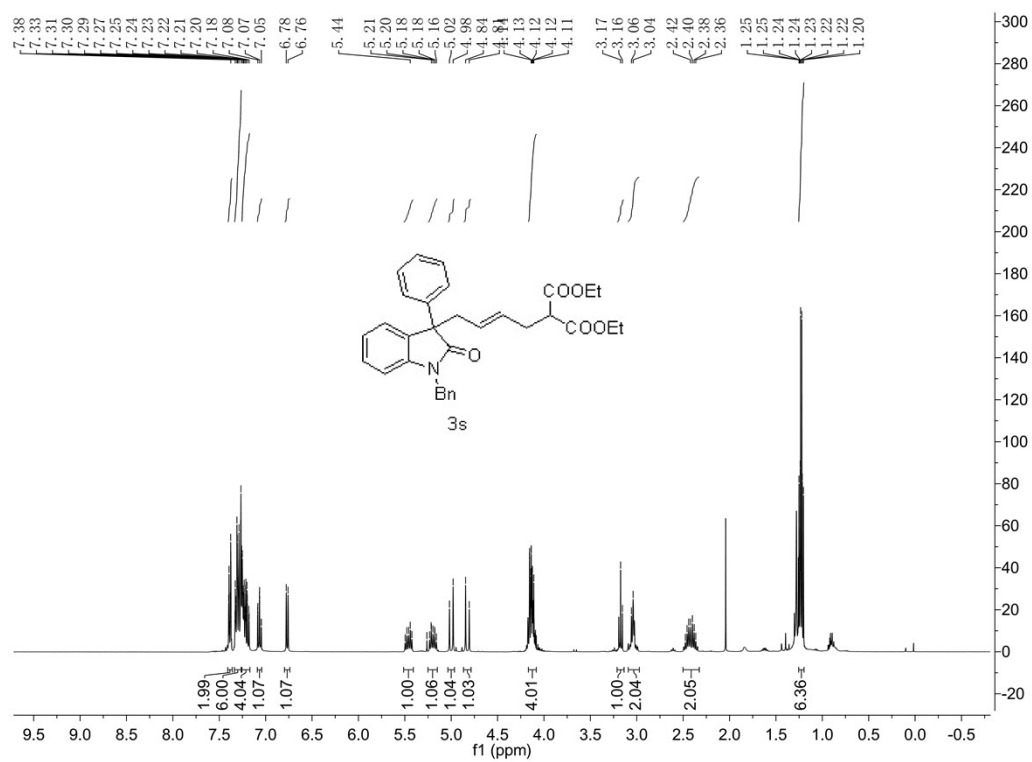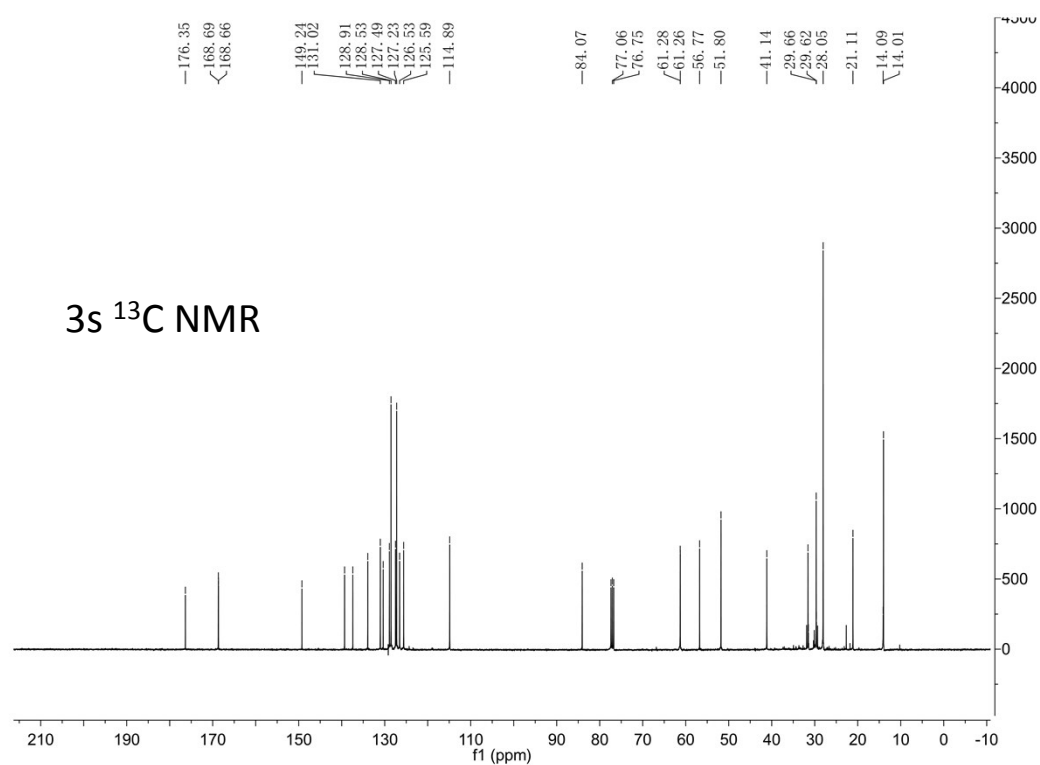

3s <sup>13</sup>C NMR

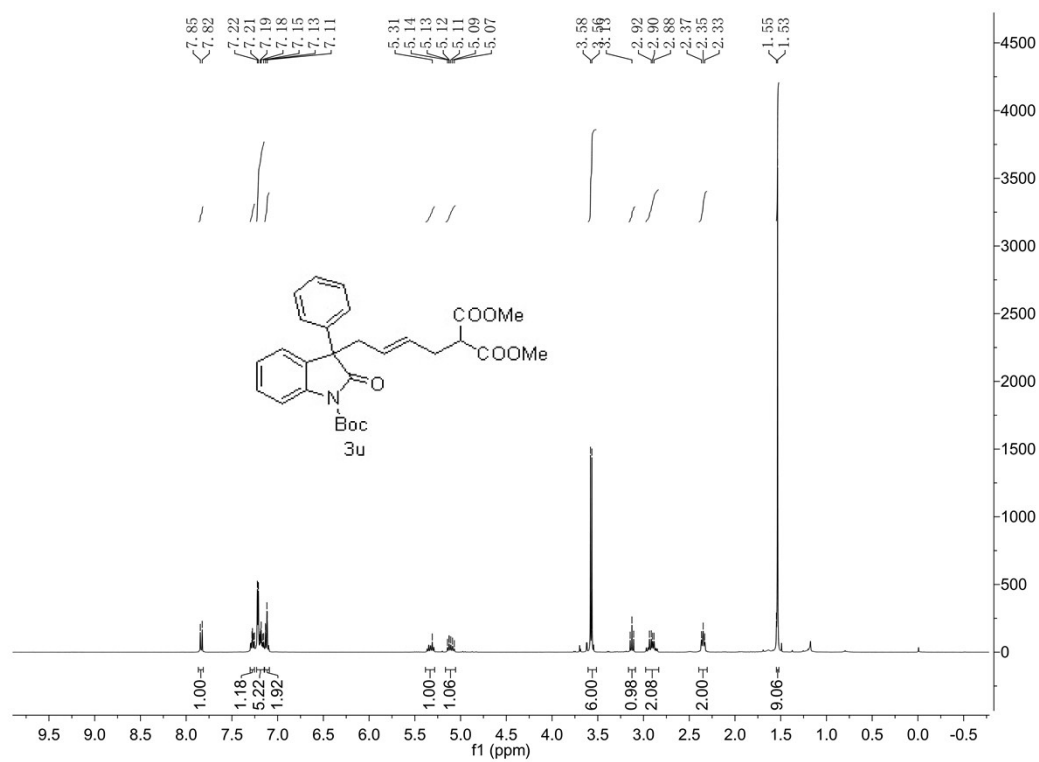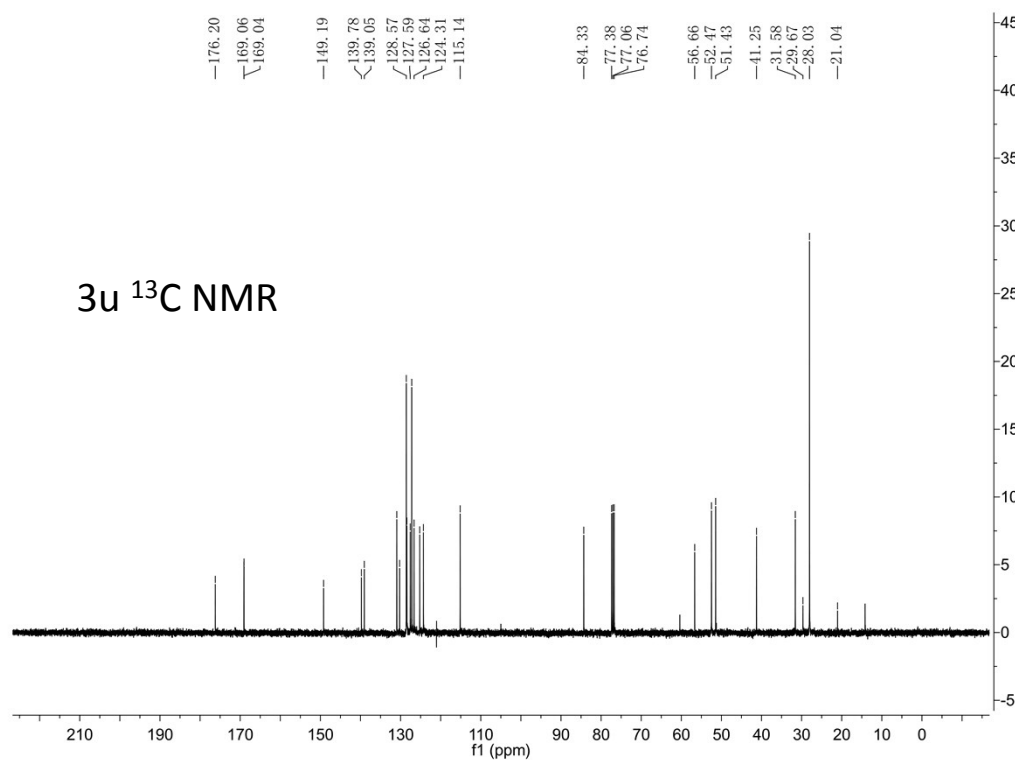

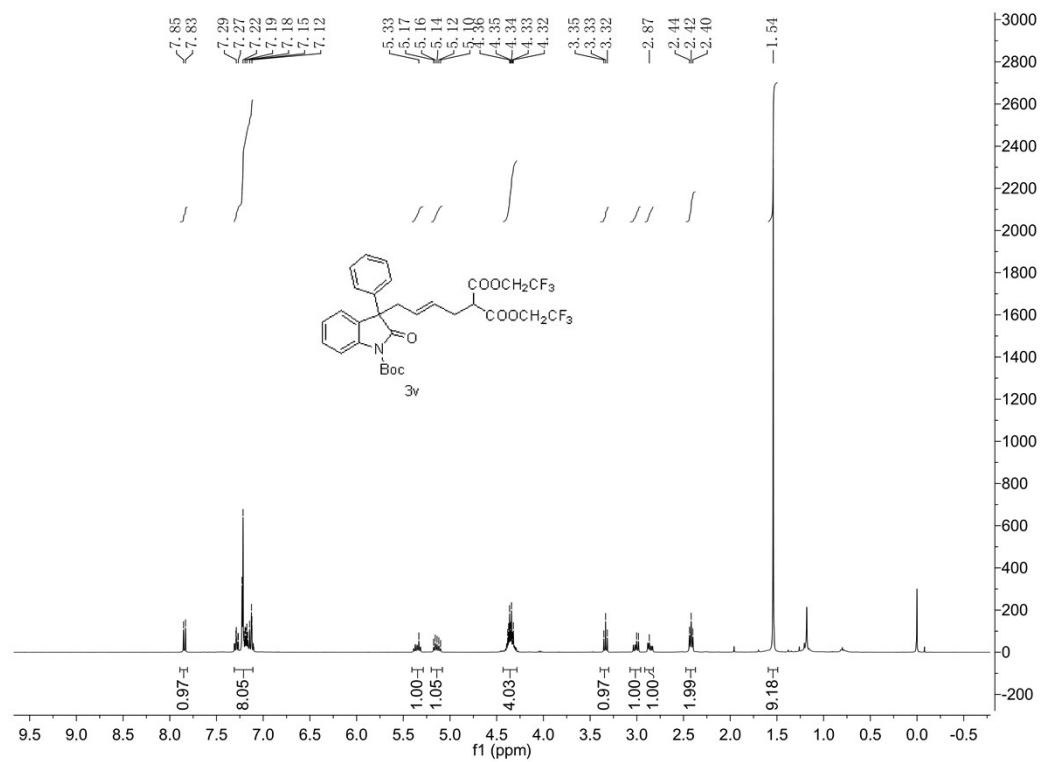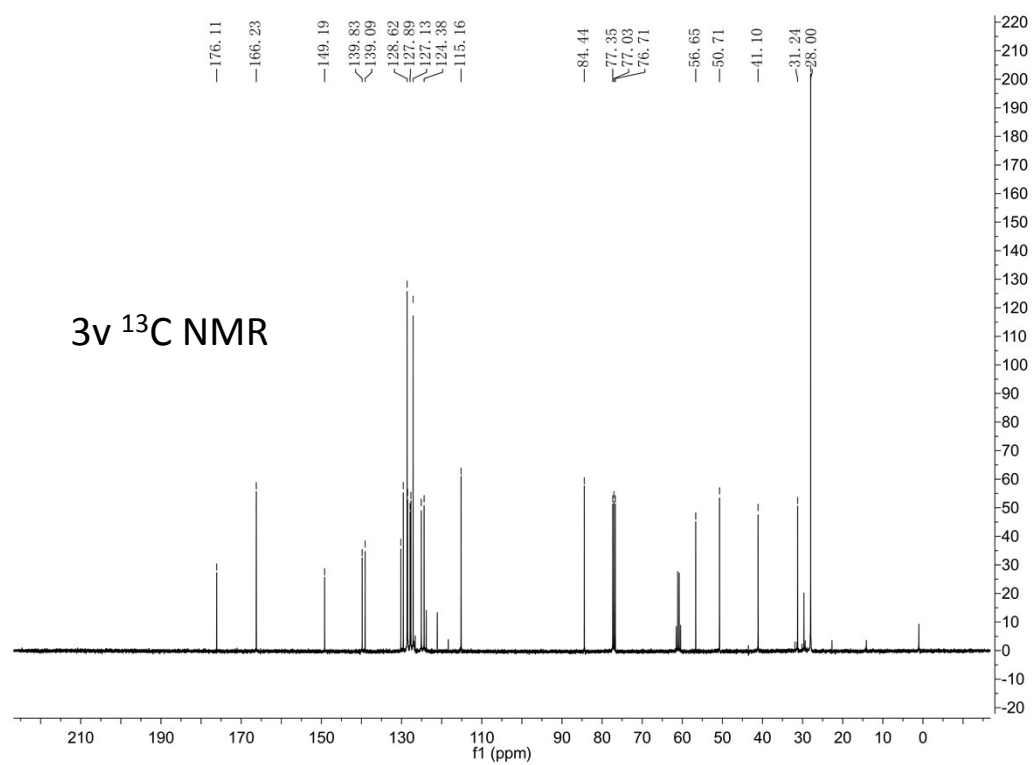

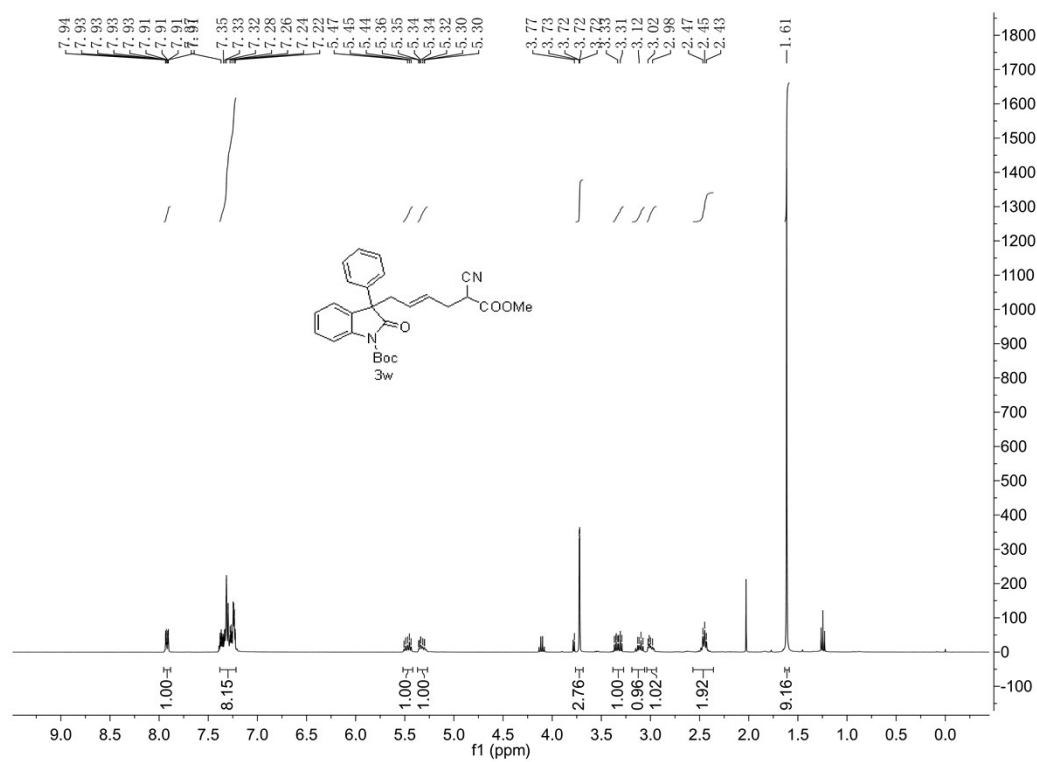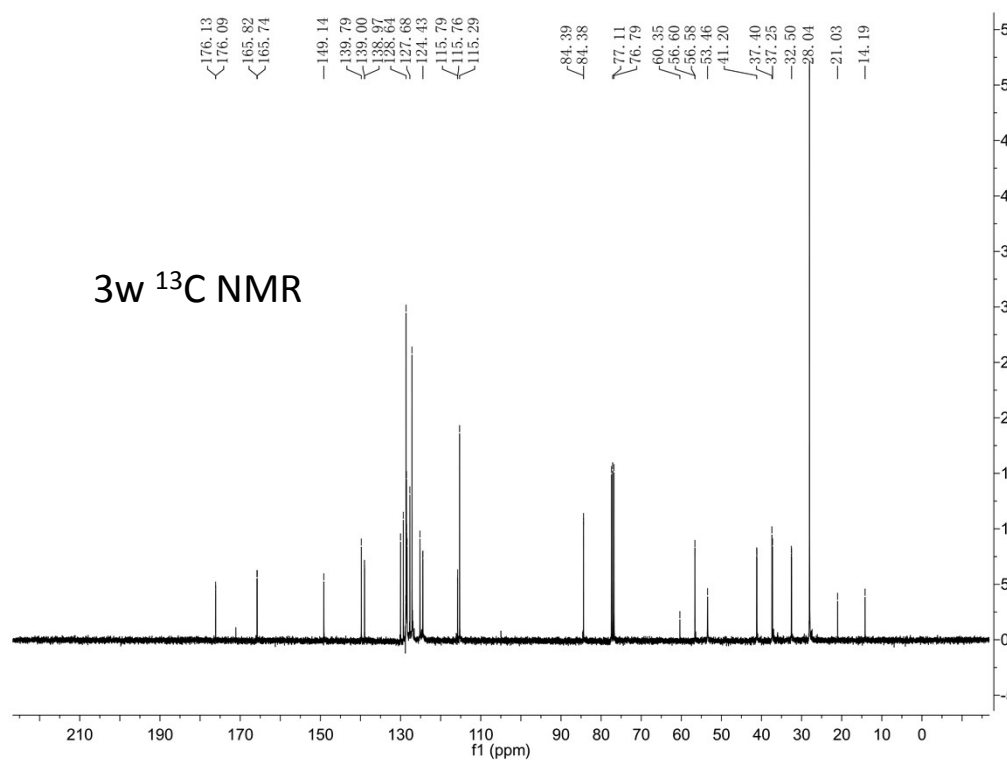



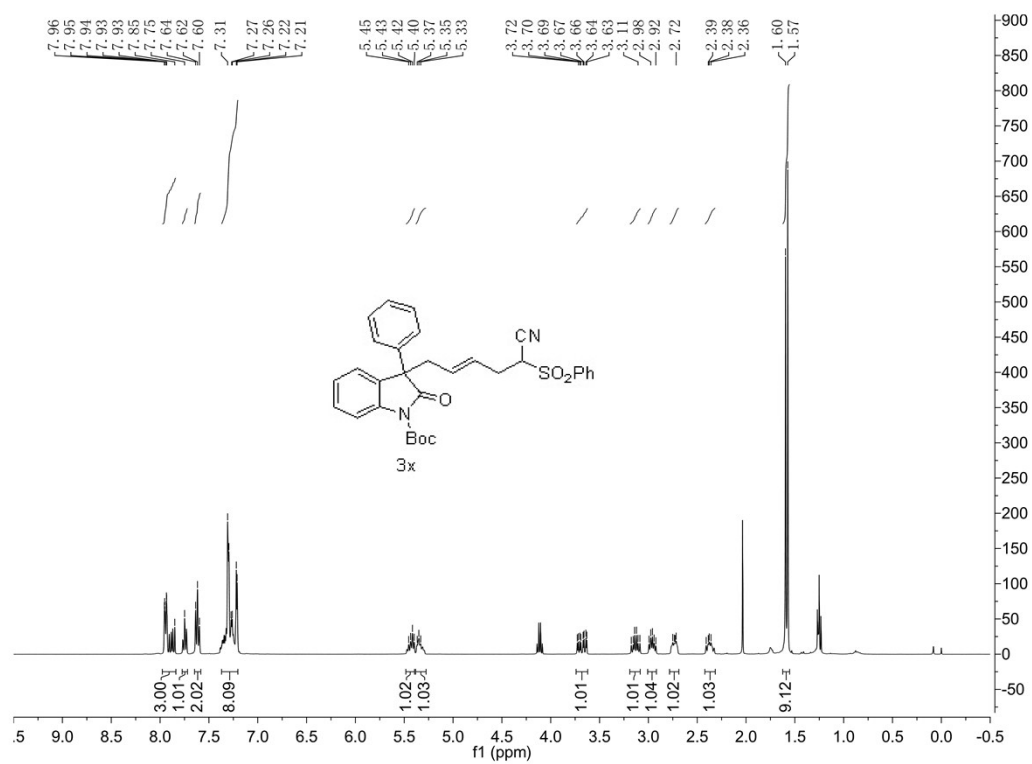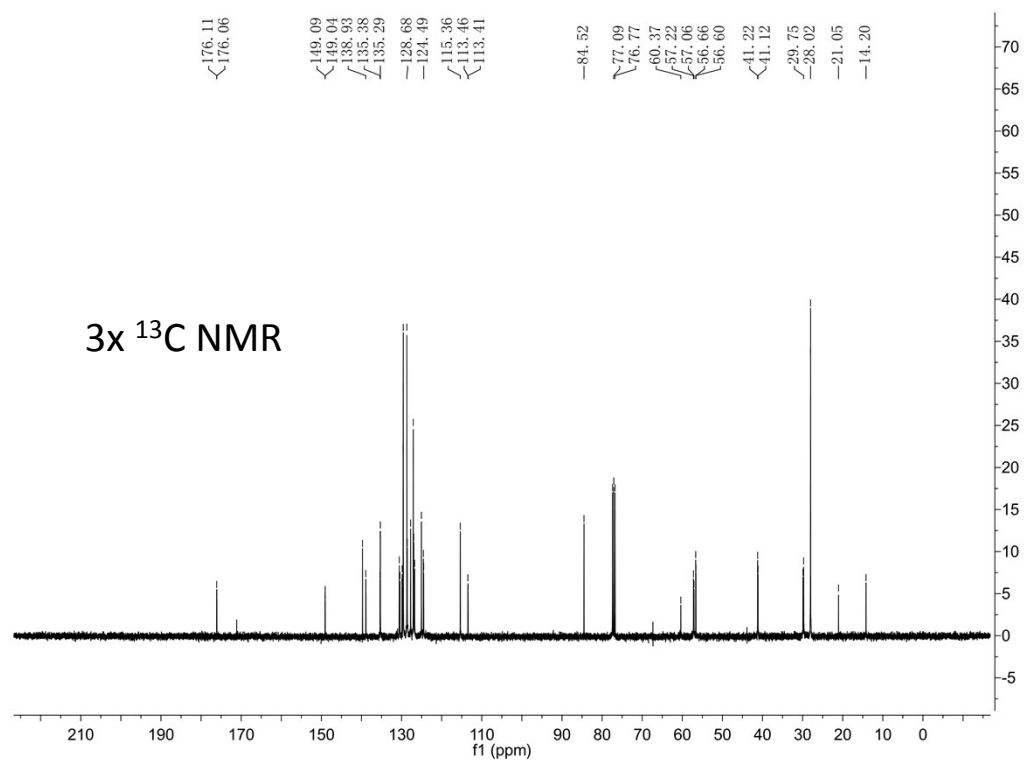

## 8 HPLC spectre:

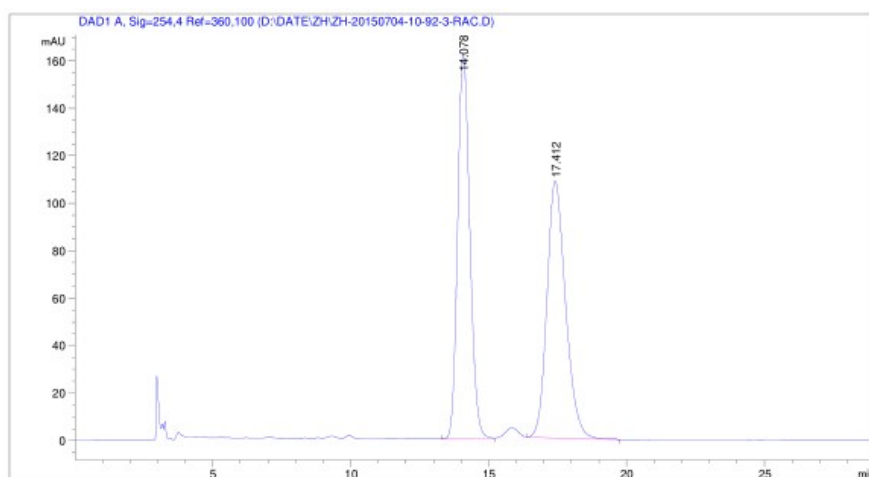

| 峰 # | 保留时间 [min] | 类型 | 峰宽 [min] | 峰面积 [mAU*s] | 峰高 [mAU]  | 峰面积 %   |
|-----|------------|----|----------|-------------|-----------|---------|
| 1   | 14.078     | BB | 0.4746   | 4952.92041  | 162.05212 | 49.3899 |
| 2   | 17.412     | BB | 0.7186   | 5075.29150  | 108.32153 | 50.6101 |

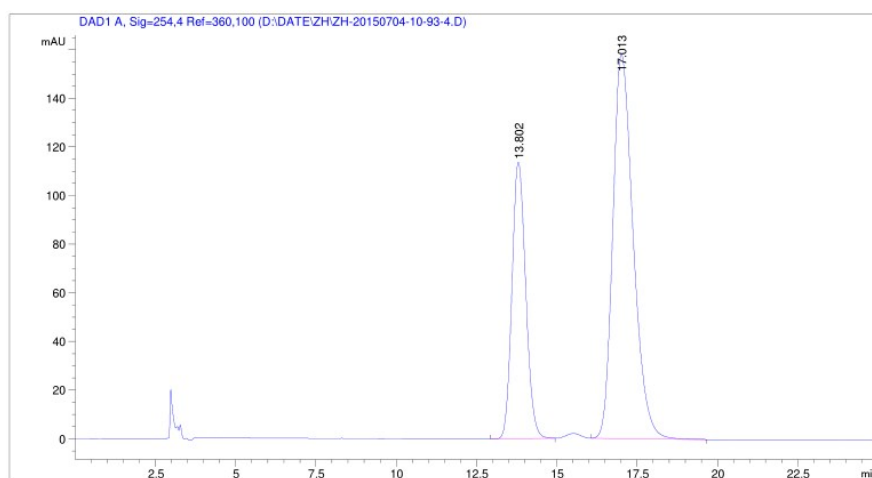

| 峰 # | 保留时间 [min] | 类型 | 峰宽 [min] | 峰面积 [mAU*s] | 峰高 [mAU]  | 峰面积 %   |
|-----|------------|----|----------|-------------|-----------|---------|
| 1   | 13.802     | BB | 0.4633   | 3385.19678  | 113.72012 | 32.6729 |
| 2   | 17.013     | BB | 0.6807   | 6975.66064  | 158.10435 | 67.3271 |
